1 Innate immune gene expression in *Acropora palmata* is consistent despite variance  
2 in yearly disease events

3

4 Benjamin Young<sup>1</sup>, Xaymara M. Serrano<sup>2,3</sup>, Stephanie Rosales<sup>3</sup>, Margaret W. Miller<sup>4,5</sup>, Dana  
5 Williams<sup>3,4</sup>, Nikki Traylor-Knowles<sup>1\*</sup>

6

7 <sup>1</sup>: Department of Marine Biology and Ecology, Rosenstiel School of Marine and Atmospheric Science, University of  
8 Miami, Miami, FL, 33145, USA

9 <sup>2</sup>: Atlantic Oceanographic and Meteorological Laboratory, National Oceanographic and Atmospheric  
10 Administration, Miami, Florida, USA

11 <sup>3</sup>: Cooperative Institute for Marine and Atmospheric Studies, University of Miami, Miami, Florida, USA

12 <sup>4</sup>: Southeast Fisheries Science Center, NOAA-National Marine Fisheries Service, Miami, FL, USA

13 <sup>5</sup>: SECORE International, Miami FL 33145

14

15 \*: Corresponding author email: [ntraylorknowles@rsmas.miami.edu](mailto:ntraylorknowles@rsmas.miami.edu) (NTK)

16

17 Key words: *Acropora palmata*, disease, transcriptomics, innate immunity

18

19

## 20 Abstract

21 Coral disease outbreaks are expected to increase in prevalence, frequency and severity due to  
22 climate change and other anthropogenic stressors. This is especially worrying for the Caribbean  
23 branching *Acropora palmata* which has already seen an 80% decrease in its coral cover, with this  
24 primarily due to disease. Despite the importance of this species, there has yet to be a  
25 characterization of its transcriptomic response to disease exposure. In this study we provide the  
26 first transcriptomic analysis of 12 *A. palmata* genotypes, and their symbiont Symbiodiniaceae,  
27 exposed to disease in 2016 and 2017. Year was the primary driver of sample variance for *A.*  
28 *palmata* and the Symbiodiniaceae. Lower expression of ribosomal genes in the coral, and higher  
29 expression of transmembrane ion transport genes in the Symbiodiniaceae indicate that the  
30 increased virulence in 2017 may have been due to a dysbiosis between the coral and  
31 Symbiodiniaceae. We also identified a conserved suite of innate immune genes responding to the  
32 disease challenge that was activated in both years. This included genes from the Toll-like  
33 receptor and lectin pathways, and antimicrobial peptides. Co-expression analysis identified a  
34 module positively correlated to disease exposure rich in innate immune genes, with D-amino  
35 acid oxidase, a gene implicated in phagocytosis and microbiome homeostasis, as the hub gene.  
36 The role of D-amino acid oxidase in coral immunity has not been characterized but holds  
37 potential as an important enzyme for responding to disease. Our results indicate that *A. palmata*  
38 mounts a similar immune response to disease exposure as other coral species previously studied,  
39 but with unique features that may be critical to the survival of this keystone Caribbean species.

## 40 Introduction

41           Since the 1980's, the Caribbean has seen dramatic losses of hard coral cover [1,2]. This  
42 has been especially notable for *Acropora palmata* and *Acropora cervicornis*, which have seen an  
43 80% reduction throughout their geographic range [2] resulting in them being classed threatened  
44 (US Endangered Species Act; ESA), and critically endangered (IUCN). The primary driver of  
45 this decline is disease [2-4] and this is particularly worrying for these species as climate change  
46 and anthropogenic stressors are now being implicated in increasing disease prevalence,  
47 frequency, and severity [5-10]. These two species are being heavily focused on for restoration  
48 activities in the Caribbean, but are historically susceptible to disease, thus it is imperative we  
49 understand the disease dynamics within the remnant populations.

50           Historically, coral disease research has focused on identifying the causative pathogens of  
51 coral disease with only a handful of studies fulfilling Koch's postulates [11,12]. This approach  
52 has proven difficult due to similar disease signs from coral species being attributed to different  
53 causative agents [13,14], while shifting disease etiologies also causes disparity of causative  
54 agents over time [15,16]. This is in part due to corals being symbiotic organisms that host a  
55 diverse set of microbial partners [17] and disentangling the roles of beneficial versus pathogenic  
56 is complex and will require interdisciplinary research efforts [11]. A new approach has been to  
57 use transcriptomics as a tool to understand the coral host's genetic response to disease exposure  
58 and disease signs [18-25]. With the wide range of microbes that can potentially cause signs of  
59 disease, focusing on the host's molecular ability to respond and resist infection has the potential  
60 to progress the coral disease field. Previous transcriptomic studies have led to the discovery that  
61 corals have a rich repertoire of putative innate immunity genes that are important in the response

62 to disease exposure [26-29]. By focusing on understanding the host's genes, it may be possible to  
63 characterize disease responses to a wide range of potential causative agents without definitively  
64 knowing exactly what they are. This will be particularly important in identifying signatures of  
65 disease resistance in coral species for restoration activities, while also providing potential  
66 diagnostic tools for coral health.

67         Despite both Caribbean Acroporid species being heavily incorporated into restoration  
68 practices, only the transcriptomic signature of *A. cervicornis* to disease exposure has been  
69 characterized [22,23]. In this study we therefore provide the first transcriptomic analysis to  
70 disease exposure in *A. palmata*, as well as its symbiotic algal Symbiodiniaceae. The coral  
71 samples used in this study were previously tested to characterize genotypic patterns of resistance  
72 to disease grafting experiments run in 2016 and 2017 [30]. Little genotypic resistance was  
73 observed for *A. palmata* with all genotypes showing some replicates with transmission of disease  
74 signs over the course of the study [30]. There were differences in disease virulence, with 2017  
75 (average 80% transmission) worse than 2016 (average 30% transmission). In this study we  
76 therefore focused on the transcriptomic response between healthy and disease outcome (disease  
77 vs no disease) rather than differences of resistance between genotypes. We hypothesized that  
78 there would be a clear transcriptomic disease response that was present in both 2016 and 2017  
79 and that there would also be transcriptomic patterns which could explain differences in disease  
80 virulence between 2016 and 2017. We found that year showed the strongest correlation to overall  
81 gene expression for both *A. palmata* and the algal symbiont Symbiodiniaceae, with genes  
82 implicating a dysbiosis between host and symbiont behind the observed higher virulence in 2017.  
83 Response to disease exposure was only identified in *A. palmata*, with significantly differentially  
84 expressed genes involved in innate immune processes present. Coexpression analysis also

85 identified two modules positively correlated to disease exposure, with this significantly enriched  
86 for lipid biosynthesis and innate immune processes [18-25].

## 87 Methods

### 88 Disease grafting experiment and genotype selection

89 For transcriptomic analysis, 12 *A. palmata* genotypes with previously published  
90 transmission information were analyzed [30]. In 2016 and 2017, disease grafting experiments  
91 were performed at the Coral Restoration Foundation (CRF; Key Largo Offshore Nursery) using  
92 12 genotypes of *A. palmata* that are actively used for outplanting projects [30]. Using an isolated  
93 nursery structure, away from the main propagation nursery, fragments of *A. palmata* were  
94 grafted to diseased fragments of *A. cervicornis* over 7-days to identify disease transmission rates  
95 between the different genotypes. Reliable field disease diagnostics are lacking for most coral  
96 diseases including those affecting Caribbean Acroporids. Hence, disease inoculants were chosen  
97 according to gross visual signs and provide no guarantee that the disease etiology was the same  
98 between fragments and years [30]. At the base of the fragment ~1cm<sup>2</sup> piece of tissue was saved  
99 for nucleic acid extractions, these were taken before disease grafting (Baseline) and after 7-days  
100 exposure. After 7-days of exposure, fragment disease outcomes were scored as follows;  
101 Exposed: No Transmission (no visible disease signs, Fig 1B) or Exposed: Transmission (visible  
102 disease signs, Fig 1C). Samples were then either flash frozen in liquid nitrogen (2016), or placed  
103 in RNAlater (2017), and then stored at -80°C. In total for transcriptomic analysis, there were 32  
104 samples in 2016 and 52 in 2017, with a breakdown of Baseline, Exposed: No Transmission and  
105 Exposed: Transmission shown in Table 1 and Fig 1A. Of the 12 total genotypes, three (HS1,

106 ML6 and CN3) were assayed in both 2016 and 2017 (Table 1) to examine any impacts of each  
107 year on gene expression and ensure it was not due to genotypic variation.

108

109 **Table 1: Breakdown of genotypes and fragments sequenced for gene expression analysis.**

| Genotype | Year | Baseline | Exposed: No Transmission | Exposed: Transmission | Total |
|----------|------|----------|--------------------------|-----------------------|-------|
| CN1      | 2016 | 1        | 3                        | 0                     | 5     |
| CN2      | 2016 | 2        | 3                        | 1                     | 6     |
| SL       | 2016 | 2        | 3                        | 0                     | 5     |
| HS1      | 2016 | 3        | 3                        | 0                     | 6     |
| ML6      | 2016 | 2        | 1                        | 3                     | 6     |
| CN3      | 2016 | 2        | 3                        | 0                     | 5     |
| HS1      | 2017 | 3        | 1                        | 2                     | 6     |
| ML6      | 2017 | 3        | 0                        | 2                     | 5     |
| CN3      | 2017 | 3        | 0                        | 3                     | 6     |
| CN4      | 2017 | 3        | 1                        | 2                     | 6     |
| ML2      | 2017 | 3        | 0                        | 3                     | 6     |
| SI5      | 2017 | 3        | 0                        | 3                     | 6     |
| SI1      | 2017 | 3        | 0                        | 3                     | 6     |
| AAA3     | 2017 | 3        | 0                        | 3                     | 6     |
| AAA2     | 2017 | 2        | 1                        | 2                     | 5     |

110 Shading for Baseline (blue), Exposed: No Transmission (yellow) and Exposed: Transmission  
111 (red) is the same for Fig 1-4. Middle section including HS1, ML6 and CN3 are the genotypes  
112 present in 2016 and 2017.

113

114 **Fig 1. Experimental summary for transcriptomic analysis.** A) A general overview of the field  
115 experiment conducted in 2016 and 2017 over 7-days each year. Samples were taken before  
116 grafting (Blue colony = Baseline) and after grafting, showing no signs of disease transmission  
117 (yellow colony = Exposed: No Transmission) or signs of disease transmission (red colony =  
118 Exposed: Transmission). Genotypes sequenced in each year are below colored coral fragments.  
119 B) The yellow circle indicates the apparently visually healthy *A. palmata* fragment grafted to the  
120 diseased *A. cervicornis* fragment after 7-days exposure. C) The red circle indicates *A. palmata*  
121 fragment showing disease signs grafted to the diseased *A. cervicornis* fragment after 7-days.

## 122 cDNA library preparation and sequencing.

123 A total of 88 samples were processed for total RNA extraction using the Qiagen RNeasy  
124 Minikit following the manufacturer's protocol with the recommended 15-minute DNase  
125 digestion for all samples. Total RNA quality and quantity were assessed using a Nanodrop and  
126 Qubit fluorometer. Total RNA was then converted to complementary DNA (cDNA) libraries  
127 using Illumina TruSeq RNA Library poly A-tail selection prep kit following the manufacturer  
128 protocol. During cDNA library preparation, Illumina adaptors were randomly assigned to reduce  
129 bias between sequencing lanes. cDNA libraries were then quantified using a Qubit fluorometer  
130 and sent to the Utah Huntsman Cancer Institute High Throughput Genomics Shared Resource  
131 Center. cDNA quality control was performed using High Sensitivity D100 Screentape. A total of  
132 84 samples passed quality control and were sequenced for 50 base pair single-end reads on 4-  
133 lanes using an Illumina HiSeq 2500.

## 134 Bioinformatic analysis

135           Sequenced libraries were processed following standard practices for RNA-seq analysis  
136 [31]. All program parameters and scripts are available at  
137 ([https://github.com/benyoung93/apal\\_disease\\_transcriptomics](https://github.com/benyoung93/apal_disease_transcriptomics)). Read quality was assessed using  
138 FastQC [32] and low-quality reads were trimmed using Trimmomatic [33]. Trimmed reads were  
139 then aligned to the *A. palmata* genome [34] using STAR [35] with the provided GFF file used for  
140 gene annotation and function. Because *A. palmata* shows stable symbioses with *Symbiodinium*  
141 (Clade A) over time and space [36], reads that did not align to the *A. palmata* genome were  
142 aligned to a *Symbiodinium* (Clade A) annotated transcriptome [37]. *A. palmata* and  
143 Symbiodiniaceae aligned reads were then quantified using Salmon [38] before being read into R  
144 (v3.6.1) and RStudio (v1.2.1335) using tximport [39]. An initial filtering for *A. palmata* (less  
145 than 1 count in greater than 15 samples), and for Symbiodiniaceae (less than 1 count in greater  
146 than 20 samples) was done using the counts per million (CPM) function in EdgeR [40]. Filtered  
147 counts were then used for differential gene expression analysis and co-expression analysis.

## 148 Coral and Symbiodiniaceae principal components analysis

149           Sample counts were transformed using the variance stabilizing transformation (VST)  
150 function in DeSeq2 [41] and used as input for principal component analysis (PCA). A modified  
151 PlotPCA function was used to identify sample distribution for *A. palmata* and Symbiodiniaceae  
152 over multiple principal components (PCs) and plotted using ggplot2 [41]. To identify genes  
153 driving sample grouping in the PCA, loadings were extracted for PCs deemed interesting, and  
154 any genes with a +/- 2 standard deviation (SD) were retained for Gene Ontology (GO) analysis.



155 We used a +/- 2 SD so to have a non-biased cut-off which was the same for each set of genes  
156 identified from *A. palmata* and Symbiodiniaceae.

## 157 Coral host differential expression between Baseline and disease 158 outcomes, and shared genes between contrasts.

159 DeSeq2 [41] was used to analyze differential gene expression for the *A. palmata*  
160 quantified transcripts. The model  $\sim$ Year + Group was used to account for batch effects caused by  
161 different preservation methods used between the different years, while ‘Group’ encompassed  
162 Baseline and disease outcomes (Exposed: No transmission and Exposed: Transmission). This  
163 removed variance from the years and allowed significantly differentially expressed genes only  
164 due to disease outcome to be analyzed. Using this model, subsequent pairwise comparisons were  
165 performed using the contrast function in DeSeq2 between experimental outcomes; ‘Baseline VS  
166 Exposed: No Transmission’, and ‘Baseline Vs Exposed: Transmission’. Genes that were  
167 significantly differentially expressed (DEGs) had a false discovery rate (FDR) adjusted p value  
168  $<0.01$ , and a Log 2-Fold Change (L2FC)  $>1$  or  $<-1$ . These sets of DEG are used in GO analysis.

169 The two sets of significantly differentially expressed genes were then analyzed to identify  
170 any shared genes between the two contrasts (Baseline Vs Exposed: No Transmission, and  
171 Baseline Vs Exposed: Transmission). The L2FC for each contrast was compared to identify any  
172 differences in expression directionality due to disease outcome, and the full set of common genes  
173 are used in GO analysis.

## 174 Weighted gene coexpression network analysis

175 To identify groups of coexpressed transcripts that correlated to Baseline and disease  
176 outcomes, a weighted gene coexpression network analysis (WGCNA; [44]) was used. Due to  
177 disease outcome being identified on PC axis 2 (Fig 2, B), the variance due to the year was  
178 removed using ‘removeBatchEffect’ in the program Limma [42]. Input data was therefore the  
179 CPM filtered batch removed counts with a VST for all 84 samples. Initial clustering using the  
180 Ward method in WGCNA [43] indicated there were no outlier samples and allowed retention of  
181 all 84 samples for coexpression analysis. A single signed network was built with manual network  
182 constructions (Key parameters: soft power = 12, minimum module size = 40, deep split = 2,  
183 merged cut height = 0.40, minimum verbose = 3, cutHeight = 0.997). The eigengene values of  
184 each module were correlated to disease outcome (Baseline, Exposed: No Transmission, Exposed:  
185 Transmission). To identify the highest connected gene within each module (hubgene), the  
186 WGCNA [43] command chooseTopHubInEachModule was used. All significant modules were  
187 then used in subsequent GO analysis.

188

189 **Fig 2. Coral and Symbiodiniaceae samples cluster firstly by year, while disease response is**  
190 **only identified in the coral.** A) Principal Component (PC) 1 and PC2 of *A. palmata* counts,  
191 using a variance stabilizing transformation (VST), identifies the difference between years as the  
192 primary driver of sample variance. B) PC2 and PC3 of *A. palmata* counts, using a VST, is driven  
193 by disease outcome. C) PC1 and PC2 of Symbiodiniaceae counts, using a VST, identifies year as  
194 the primary driver of sample variance. D) PC2 and PC3 of Symbiodiniaceae counts, using a  
195 VST, shows no effect of disease outcome. For A) and C), black ellipses represent a 95%

196 confidence interval in 2016 and 2017. For B) and D), the colored ellipses represent 95%  
197 confidence intervals for Baseline (blue), Exposed: No Transmission (yellow) and Exposed:  
198 Transmission (red).

199

## 200 Gene ontology analysis

201 To identify significant enrichment of GO terms (biological process, cellular component,  
202 and molecular function) Cytoscape v3.7.2 [44], with the add-on application Bingo [45], was used.  
203 The hypergeometric test was utilized for GO enrichment and p-values were corrected with a  
204 Benjamini & Hochberg false discovery rate (FDR) correction (alpha set at < 0.01). The full  
205 mRNA transcriptome, available with the *A. palmata* genome [34], was used as the background  
206 set of genes for the enrichment tests. GO visualization was then done in Cytoscape v3.7.2 (45)  
207 allowing identification of significantly enriched relationships between parent and child terms.  
208 Genes in significantly enriched GO terms of interest were then visualized in RStudio using the  
209 VST counts and Complex Heatmap [46].

## 210 Results

### 211 Sequencing depth, read alignment, assignment metrics

212 A total of 84 samples were successfully sequenced on 4-lanes of an Illumina HiSeq 2500  
213 with an average single-end read depth of 10,808,777. All raw reads are available on NCBI (SRA  
214 PRJNA529682). From quality filtered sequences, 74.64% of single end reads mapped to the *A.*

215 *palmata* genome [34] using STAR [35]. Quantification, using Salmon [38], resulted in 35,079  
216 genes having at least one count across all samples, with subsequent CPM filtering (less than 1  
217 count in > 15 samples) reducing this to 18,913 genes for downstream analysis. Of reads not  
218 aligning to the *A. palmata* genome, an average of 21.54% aligned to the *Symbiodinium* (Clade A)  
219 reference transcriptome [37] using STAR [35]. Quantification using Salmon [38] yielded counts  
220 for 72,152 transcripts, with 28,035 of these retained for downstream analysis after CPM filtering  
221 (less than 1 count in greater than 20 samples).

222 **Year was the greatest driver of gene expression for *A. palmata***  
223 **and Symbiodiniaceae gene expression with ribosomal and ion**  
224 **transport genes driving sample clustering.**

225 PCA showed *A. palmata* samples clustered by year on PC 1 (PC1 = 45%; Fig 2, A),  
226 followed by disease outcome on PC 2 (PC2 = 13%; Fig 2, B). Symbiodiniaceae samples also  
227 clustered by year on PC1 (PC1= 82%; Fig 2, C) while PC 2 showed no correlations to disease  
228 exposure or genotype (Fig 2, D).

229 Analysis of the genes driving PC1 variance for *A. palmata* identified 86 significantly  
230 enriched GO processes; 48 Biological Process, 6 Molecular Function, and 32 Cellular  
231 Components. Within Biological Process and Cellular Component, genes associated with  
232 ribosomal structure and function, as well as ribosomal RNA processing were significantly  
233 enriched. Three GO terms were also linked to immune processes; cell-cell adhesion, extracellular  
234 vesicular exosome, and apolipoprotein binding. Visualization of the VST counts for the genes  
235 within these GO terms identified 4 heatmap clusters (Fig 3, A). All genes linked to ribosomal

236 processes showed lower normalized counts in 2017 than 2016, while GO terms with potential  
237 immune genes and functions showed higher normalized counts in 2017 than in 2016 (Fig 3, A).  
238 Principal component 1 loadings and full GO results for *A. palmata* are available in Supp 1.

239

240 **Fig 3: Genes driving the difference between 2016 and 2017 responses in the coral host and**

241 **Symbiodiniaceae.** A) Coral host genes linked to significantly enriched gene ontology (GO)

242 terms, identified from principal component (PC) 1 loadings. Genes are linked to translation and

243 ribosomal formation processes. Hierarchical clustering of the samples (heatmap columns) shows

244 grouping between the samples from 2016 (grey) and 2017 (black), with 2016 genes having

245 higher normalized expression and 2017 having lower normalized expression. B)

246 Symbiodiniaceae genes linked to significantly enriched GO terms identified from PC1 loadings.

247 Genes are linked to transmembrane ion transport processes. Hierarchical clustering of the

248 samples (heatmap columns) shows grouping between the samples from 2016 (grey) and 2017

249 (black). For A) and B), grey = 2016 samples, black = 2017 samples. Left heatmap fill shows

250 higher (red) to low (blue) gene counts using a variance stabilizing transformation. Right heatmap

251 is presence (black) and absence (white) of genes to GO terms. Column dendrogram shows

252 hierarchical clustering of samples. Rows (genes) also arranged using hierarchical clustering with

253 dendrogram omitted.

254

255 For Symbiodiniaceae, there were 120 significantly enriched GO processes; 48 Biological

256 Process, 6 Molecular Function, and 32 Cellular Components. In all three GO components,

257 significantly enriched terms identified 2 main gene processes. Genes implicated in the transport

258 of ions between cells and cellular components showed higher expression in 2017 than in 2016  
259 (Fig 3, B). This included plasma membrane iron permease, nitrate and nitrite transporters,  
260 sodium transporters, zinc transporters, and ammonium transporters. Genes linked to  
261 photosynthesis, namely photosystems I and II in the light dependent reaction, also showed  
262 significant GO enrichment. The genes within these photosynthesis terms did not exhibit higher or  
263 lower expression compared between year, but instead showed a range of expression across the  
264 samples for each year (Supp 2). Principal component 1 loadings and full GO results for  
265 Symbiodiniaceae are available in Supp 3.

## 266 Significant differential gene expression was identified between 267 different disease outcomes in *A. palmata*

268 Differential gene expression analysis was only done for *A. palmata* due to there being no  
269 disease response identified in the Symbiodiniaceae. For Baseline Vs Exposed: No Transmission,  
270 there were 139 transcripts significantly downregulated, and 679 transcripts significantly  
271 upregulated, while Baseline Vs Exposed: Transmission had 678 transcripts significantly  
272 downregulated and 673 transcripts significantly upregulated (Fig 4A). Full lists of significant  
273 DEG for each contrast are available in Supp 4 and Supp 5 respectively. Between each contrast,  
274 there were 422 shared differentially expressed transcripts (Fig 4A). Of these, only 2 showed  
275 opposite LFC directionalities; a 'PREDICTED cyclin-dependent kinase 11B-like partial'  
276 (Baseline Vs Exposed : No Transmission L2FC = 2.57, Baseline Vs Exposed : Transmission  
277 L2FC = -1.98), and a Aspartate 1-decarboxylase (Baseline Vs Exposed: No Transmission L2FC  
278 = 1.53, Baseline Vs Exposed: Transmission L2FC = -2.18). A full list of shared genes with LFC  
279 is available in Supp 6.

280

281 **Fig 4: Unique and common genes between differential expression contrasts and significant**

282 **innate immune genes in diseased corals.** A) Venn diagram of the unique (left and right) and

283 shared (intersect) differentially expressed genes from the two contrast arguments run in DeSeq2.

284 The green arrow shows significantly upregulated, the red arrow shows significantly

285 downregulated genes. B) Heatmaps showing genes linked to significantly enriched innate

286 immune gene ontology (GO) terms identified from the Baseline versus Exposed: Transmission

287 DeSeq2 contrast. Samples included are Baseline (blue) and Exposed: Transmission (red). Left

288 heatmap fill shows higher (red) to low (blue) gene counts using a variance stabilizing

289 transformation. Right heat map identifies genes present (black) or absent (white) from

290 significantly enriched GO terms linked to innate immune response. Column dendrogram shows

291 hierarchical clustering of samples. Rows (genes) also arranged using hierarchical clustering with

292 dendrogram omitted.

293

294 **Contrast between Baseline and Exposed: No Transmission**

295 The significant DEGs for the contrast between Baseline and Exposed: No transmission

296 showed significant enrichment of 18 GO terms (4 Biological Process, 7 Molecular Functions,

297 and 7 Cellular Components). Biological Processes identified terms associated with cell adhesion

298 and cell surface receptor linked signaling pathways including a number of putative immune

299 function genes such as: tumor necrosis factors (TNFs), WNT proteins, protein kinase C epsilon

300 type, and genes involved recognition such as Apolipoprotein and C-type lectins. All significant

301 GO terms and associated genes are available in Supp 4.

## 302 Contrast between Baseline and Exposed: Transmission

303 The significant DEGs for the contrast between Baseline and Exposed: Transmission  
304 showed significant enrichment of 46 Biological processes, 14 Cellular Component, and 35  
305 Molecular Function. GO terms linked to Defense Response, Bioluminescence, and Cytokine  
306 Activity contained innate immune genes important in the main processes of innate immunity;  
307 recognition, signaling, and effector responses. Within these enriched GO terms there were a  
308 number of recognition innate immune genes, including four genes similar to Toll-like receptor  
309 (TLR) 2, and 2 genes similar to TLR 6 complexes (Fig 4, B). There were also lectin pathway  
310 recognition genes such as: C-type lectin domain family 4 member E and M, Ficolin-1. As well as  
311 other receptors which have been implicated in innate immunity; F-box/LRR-repeat protein 20,  
312 Histamine H1 receptor, Macrophage mannose receptor 1, two NOD-like receptor proteins, and a  
313 neurogenic locus notch protein (Fig 4. B). Innate immune genes involved in signaling pathways  
314 were also present, including TLR signaling pathway components such as; Deleted in malignant  
315 brain tumour 1, CCAAT/enhancer-binding protein gamma, Gremlin 1 and 2, NACHT LRR and  
316 PYD domain contain proteins 12 and 9A, TNF receptor-associated factor 3, TNFAIP3-  
317 interacting protein 1, and E3 ubiquitin-protein ligase TRIM56 (Fig 4, B). There were also genes  
318 important in lectin signaling; complement C2 and C3 fragments. Finally, there were genes  
319 involved in effector responses of innate immunity including antimicrobial peptides (AMPS) such  
320 as Achacin and Bactericidal permeability-increasing protein, and a pathogen related protein. Two  
321 genes identified as transcription factors; CCAAT/enhancer-binding protein gamma, and  
322 Interferon-inducible GTPase 1 and interferon regulatory factor 8 (Figure 4B). All significant GO  
323 terms and associated genes are available in Supp 5.



324 Co-expression analysis identifies positively correlated modules of  
325 immune genes and lipid biosynthetic processes to disease  
326 exposure.

327 After merging of similar modules, we identified 19 coexpressed modules that contained  
328 76 to 2027 genes (Fig 5A, Supp 7). Of these 19 modules, 8 showed significant correlations to  
329 Baseline and disease outcomes (Exposed: No Transmission, and Exposed: Transmission) (Fig 5  
330 B). Gene lists for all modules is provided in Supp 8.

331

332 **Fig 5: Coexpression analysis identifies 19 gene modules, with eight significantly correlated**  
333 **to Baseline and Exposed corals.** A) Dynamic tree height showing merging of modules with  
334 similar expression patterns. Merging resulted in the 43 original modules (Dynamic Tree Cut)  
335 being merged into 19 modules (Merged dynamic) B) Coexpression heatmap showing the 8  
336 modules that are significantly correlated between Baseline and both disease outcomes  
337 (Lightgreen, Brown, Skyblue), Baseline and Exposed: No Transmission (Cyan, Grey60, and  
338 Medumpurple), and Baseline and Exposed: Transmission (Black and Darkolivegreen). Heatmap  
339 fill shows positive (red) to negative correlation (blue). The top number in each cell shows the  
340 correlation strength, and the bottom number shows module significance to Baseline or disease  
341 outcomes. Bar graph to the right shows the number of genes within each module. C) The six  
342 modules which are significantly correlated between Baseline and Exposed: No Transmission  
343 showing the module membership and gene significance. D) The five modules that are significant  
344 between Baseline and Exposed: Transmission showing the module membership and gene  
345 significance. For C and D; y-axis shows gene significance which is the absolute value of the

346 correlation between the gene and disease outcome, x-axis shows the module membership which  
347 is the correlation of the module eigengene and the gene expression profile.

348

349 Of the 19 modules, ‘Lightgreen’ (366 genes, hub gene = Interferon Regulatory Factor 2),  
350 ‘Brown’ (1656 genes, hub gene = D-amino-acid oxidase) and ‘Skyblue’ (220 genes, hub gene =  
351 PREDICTED: uncharacterized protein LOC107335116) were all significantly correlated  
352 ( $p \leq 0.05$ ) across Baseline and disease outcomes. These modules were significantly enriched  
353 (FDR,  $p < 0.01$ ) for multiple GO Biological Processes, Cellular Components and Molecular  
354 Functions with 58 terms for the ‘Brown’ module, 1 for ‘Skyblue’ and 0 for ‘Lightgreen’. The  
355 ‘Brown’ module showed a negative correlation for Baseline ( $R^2 = -0.75$ ) but was positively  
356 correlated for disease outcomes; Exposed: No transmission = 0.24, and Exposed: Transmission =  
357 0.59 (Fig 5, C & D). The ‘Brown’ module was significantly enriched for terms in immune  
358 processes such as TLR-6 signaling pathway and MyD88-dependent signaling pathways, positive  
359 regulation of cytokine biosynthetic processes, detection and response to diacylated bacterial  
360 lipopeptide, podosome, phagocytic and endocytic vesicle membranes, and lipopeptide binding.  
361 The ‘Skyblue’ module was significantly enriched for only lipid biosynthetic processes.

362 Three modules were significantly correlated to Baseline and Exposed: No transmission;  
363 ‘Cyan’ (838 genes, hub gene = F-box/LRR-repeat protein 7), ‘Grey60’ (1003 genes, hub gene =  
364 Isopentenyl-diphosphate Delta-isomerase 1), and ‘Mediumpurple’ (97 genes, hub gene =  
365 pyridoxine-5`-phosphate oxidase) at  $p \leq 0.05$  (Figure 5, B). The ‘Cyan’ module was significantly  
366 enriched (FDR,  $p < 0.01$ ) for 40 GO Biological Processes that included genes involved in cell  
367 adhesion, immune responses (complement activation, leukocyte mediated immunity, regulation  
368 of coagulation), and metabolic/catabolic processes but showed negative correlations with disease

369 outcomes (Fig 5, C). ‘Mediumpurple’ was enriched for GO terms involved in respiration  
370 (electron transport chain, oxidative phosphorylation, ATP synthesis) as well as biosynthetic  
371 processes and the positive regulation of necrotic cell death. ‘Grey60’ was enriched for three GO  
372 terms: cellular metabolic processes, nitrogen compound metabolic processes and cellular  
373 nitrogen compound metabolic processes.

374 Two modules were significantly correlated to Baseline and Exposed: Transmission;  
375 ‘Black’ (1423 genes, hub gene = Ufm1-specific protease 2), and ‘Darkolivegreen’ (183 genes,  
376 hub gene = S-adenosylmethionine decarboxylase proenzyme) at  $p \leq 0.05$  (Figure 5, B). The  
377 ‘Black’ module was significantly enriched with one GO term: metabolic processes, while  
378 ‘Darkolivegreen’ module was not significantly enriched for any GO terms. All GO terms with  
379 associated genes for significant modules are provided in Supp 9.

## 380 Discussion

381 Our study demonstrates that *A. palmata* mounts a similar immune response to disease as  
382 seen in other stony coral species [18-25], with transcriptomic analysis also identifying potential  
383 coral and Symbiodiniaceae mechanisms for higher disease virulence in 2017 [30]. We also found  
384 that within Symbiodiniaceae, genes linked to ion transport had higher normalized expression in  
385 2017 compared to 2016. This indicates the higher disease prevalence observed by [30] was due to  
386 potential dysbiosis with the Symbiodiniaceae.

387 Gene expression signatures between 2016 and 2017 show a  
388 complementary interaction between Symbiodiniaceae and *A.*  
389 *palmata*

390 Previously it was found that there were higher rates of disease incidence in the grafting  
391 experiments from 2017 compared to 2016 [30]. This increase in disease incidence was  
392 hypothesized to be attributed to heightened disease virulence and/or more susceptible genotypes  
393 used in 2017 compared to 2016 [30]. In the current study, we included three genotypes that were  
394 used in both 2016 and 2017 challenge experiments; HS1, ML6 and CN3 (Table 1). Samples from  
395 these genotypes clustered with the year they were exposed to disease, indicating that genotype  
396 susceptibility was probably not the cause for the differences in disease prevalence (Fig 2, A).  
397 Our results indicate that other factors such as disease type, disease virulence, and the base health  
398 of the coral could be potential factors that led to the higher incidence of observed diseases in  
399 2017 [10,26,47]. Additionally, we identified that the *A. palmata* genes driving the difference  
400 between 2016 and 2017 were putative coral ribosomal proteins (Fig 3A, Supp 1). These genes  
401 had lower overall normalized counts in 2017 compared to 2016 and were involved in translation,  
402 rRNA processing, and ribosome biogenesis (Fig 3A). The production of ribosomal proteins are  
403 key for the translation of mRNA into proteins, and thus gene expression. The potential reduction  
404 in the transcription of these genes in 2017 indicates that the protein production machinery may  
405 have been compromised, leading to less physiological and immunological homeostasis and thus  
406 higher amounts of disease prevalence [30,48,49].

407 Conversely, in Symbiodiniaceae, the genes driving the separation of the samples from  
408 2016 and 2017 had higher levels of expression in 2017, with the majority of these genes being

409 involved in ion transmembrane transporter activity (Fig 3B). We hypothesize that this inverse  
410 pattern of expression to the *A. palmata* expression could indicate that in 2016 the symbiotic  
411 relationship was in equilibrium between the host and Symbiodiniaceae but in 2017, a dysbiosis  
412 between host and Symbiodiniaceae was present. This may be due to two potential mechanisms.  
413 In 2017, Symbiodiniaceae health may have been limited by certain ions due to a more virulent  
414 disease, or an external abiotic factor causing negative impacts. As such, increased expression of  
415 genes regulating ion exchange to different molecular compartments was increased to maintain  
416 ion balance needed for cellular functions. In Symbiodiniaceae we identified genes encoding for  
417 plasma membrane iron permease, voltage-gated sodium channels for sodium transport,  
418 ammonium, and nitrate transporters ions. All of these transporters facilitate the movement of  
419 iron, ammonium, and nitrate, which are all important for photosynthesis [50-53]. Being limited  
420 by these ions causes a lower rate in photosynthetic efficiency and therefore decreases the energy  
421 supply provided to the coral host [54,55]. This may indicate that corals in 2017 had less energy  
422 being supplied to the coral host by the Symbiodiniaceae. Alternatively, it has also been shown  
423 that in high nutrient environments Symbiodiniaceae within the coral host can become parasitic  
424 and can then decrease the translocation of energy to the coral [56]. The Florida Keys have seen  
425 increased nutrient loading from anthropogenic sources [57,58], which has been linked to  
426 increases in bleaching and disease susceptibility [59]. This should be tested in the future to fully  
427 understand the impacts of higher nutrients on disease susceptibility in *A. palmata* and how it  
428 impacts the relationship with the Symbiodiniaceae.

429 **Enrichment of cell adhesion genes was found in corals that did**  
430 **not show signs of disease**

431 Corals that were exposed to disease, but did not show signs of transmission, had  
432 significant differential expression of genes that were enriched for the GO terms: “Cell  
433 Adhesion”, and “Cell surface receptor linked signaling pathways” (Supp 4). Cell adhesion is  
434 important to maintaining the integrity of the tissue layer and within corals, evidence has been  
435 presented that factors, including heat stress and disease, can cause upregulation of genes  
436 involved in cell adhesion pathways [20,60-63]. Interestingly, in previous coral disease studies,  
437 cell adhesion enrichment was present in corals that were showing signs of disease pathology and  
438 hypothesized to be due to the importance of apoptotic processes and phagocytosis of melanized  
439 particles and pathogens [20,21]. Our findings show that cell adhesion is also important in corals  
440 not exhibiting visual signs of disease. These processes should be explored further to elucidate  
441 differences between corals showing various disease pathologies, and whether these processes are  
442 important in genotypic differences in patterns of disease resistance.

443 **Visual signs of disease are characterized by an innate immune**  
444 **response in *A. palmata*.**

445 PC2 showed a correlation to disease outcome in *A. palmata* (Fig 2B). A common disease  
446 response was observed regardless of the year, and this included a number of innate immune  
447 processes important in recognition, signaling and effector responses. Most notably genes linked  
448 to TLR signaling, the complement cascade, and antimicrobial peptides were present in *A.*  
449 *palmata* exhibiting signs of disease (Fig 4B). These genes may be part of a primary disease

450 response of *A. palmata* and warrant further investigation into their functional significance in  
451 overall disease response as well as disease resistance.

452 *A. palmata* fragments which showed signs of disease had enrichment for GO terms  
453 involved in innate immune response including “Defense Response”, “Cytokine Activity”, and  
454 “Bioluminescence” (Fig 4B, Supp 5). Our results are similar to previous transcriptomic studies,  
455 where innate immunity genes were upregulated in response to disease transmission [18-25]. We  
456 identified significantly upregulated TLR 2 and TLR 6 genes which are important innate immune  
457 pattern recognition receptors (PRR) that identify gram-negative bacteria and fungi respectively  
458 [64,65]. These receptors are important in initiating the Nuclear Factor Kappa Beta (NF-kB)  
459 transcription factor [66-68] that causes production of cytokines and AMPs [69-71]. While other  
460 components of the NF-kB pathway were not significantly differentially expressed in this study,  
461 they are present in the *A. palmata* genome [34] and have been functionally characterized in the  
462 coral *Orbicella faveolata* [68].

463 Our differential expression results also identified transcripts annotating to AMPs; a  
464 bactericidal permeability-increasing protein which has gram-negative bacteria killing properties  
465 by targeting the lipopolysaccharide outer layer [72-76], and Achacin, an AMP present in African  
466 Giant Slug mucus that has potent gram-positive and gram-negative bacteria killing properties  
467 [77-79]. To our knowledge, these AMPs have not been characterized in any other coral disease  
468 studies. This is especially notable for *A. cervicornis*, where neither of these have been reported  
469 [22,23]. With the short evolutionary split between *A. palmata* and *A. cervicornis* [80], it would be  
470 expected that these AMPs would be present in both species. Re-annotation of past *A. cervicornis*  
471 studies with the new *A. cervicornis* genome may identify these AMPs which were previously  
472 uncharacterized in the disease response or identify them as unique to *A. palmata*.

473 Significant differential expression was also identified for 5 lectins including C-type lectin  
474 domain family 4 member E and M, Ficolin-1, and Tachylectin-2, and Macrophage mannose  
475 receptor 1. These lectins are involved in identifying pathogens and initiating the complement  
476 pathway shown to be important in coral symbioses with Symbiodiniaceae [81-83], as well as in  
477 response to pathogens and disease [21,24,81,84]. Our findings support previous studies that  
478 lectins play a complex role in both symbiosis and pathogen recognition in corals, however, the  
479 specific mechanisms and pathways these lectins initiate are still not well understood. A number  
480 of genes were also identified to have roles in potential macrophage immune roles. Cationic  
481 amino acid transporter has been identified to have a role in macrophage immunity [85], while  
482 tyrosine-protein kinase Src42a has been shown to promote macrophages to sites of wounding  
483 [86]. Other studies have shown that a sponge has potential macrophage expressed protein activity  
484 [87,88] and that the identified gene is extremely similar to humans identifying a conserved  
485 immune process through evolution. While invertebrates do not have adaptive immunity, this may  
486 indicate an innate immune phagocytic pathway for managing pathogen infection in *A. palmata*.

487 **Lipid biosynthesis may play a key role in the activation and**  
488 **maintenance of an immune response in *A. palmata***

489 The ‘Skyblue’ coexpression module showed a positive correlation with disease outcome  
490 (Fig 5B), with significant enrichment of the GO term ‘lipid biosynthetic processes’. This,  
491 coupled with the differential gene expression between Baseline and Exposed: Transmission,  
492 indicates that *A. palmata* was mounting an energetically expensive immune response to the  
493 disease challenge. Furthermore, the enrichment of lipid biosynthetic processes in the ‘skyblue’  
494 module may indicate that the corals sampled in this study have stored energy, in the form of



495 lipids, which can be metabolized and assist in promoting a stronger inflammatory response and  
496 fighting off pathogens [89]. This idea has been proposed in other transcriptomic studies on coral  
497 disease [25] indicating that this could be integral to multiple coral species disease responses. In  
498 the future, linking *A. palmata* lipid production and storage with disease susceptibility may be an  
499 important metric for understanding their capacity of resistance and recovery in relation to  
500 disease. Genotypes with a higher capacity of lipid production and storage may also be able to  
501 initiate a stronger immune response. This has been shown to be true in coral bleaching, namely  
502 that individuals with higher lipid stores were able to survive without the Symbiodiniaceae for  
503 longer periods of time. This is due to lipids being burnt by the coral resulting in energy allowing  
504 continued key life dependent functions [90-92]. This may also be true for disease, with  
505 individuals and genotypes with higher lipid stores able to mount a stronger and/or longer  
506 immune response.

507 ‘Brown’ module is rich in innate immune genes and the hub gene,  
508 D-amino acid oxidase, is a critical immune factor involved in *A.*  
509 *palmata* disease response.

510 The “Brown” coexpression module showed increasing positive correlations with disease  
511 outcomes (Fig 5, C & D), and included significant enrichment of innate immunity genes and GO  
512 terms (Supp 9). Within the “brown” module, D-amino acid oxidase (DAO) was identified as the  
513 hub gene. DAO is a peroxisomal enzyme that has been identified to be important in mucosal  
514 microbiome homeostasis and leukocyte phagocytic activity in mammalian models [93-96]. In  
515 corals this enzyme, to our knowledge, has not been documented in response to disease, and its  
516 presence as a hub gene in disease response could indicate that it is a critical immune factor that

517 has previously been overlooked. In mammalian models free-floating D-amino acids (DAA),  
518 which are actively released by bacteria, are catalyzed by DAO. Phagocytic cells have been  
519 shown to be chemo attracted to free-floating DAA by recognition through G-coupled protein  
520 receptors [93]. There are a number of G-coupled protein receptors present in the “brown” module  
521 (Supp 8), indicating these may be involved in the recognition of DAA during phagocytosis in *A.*  
522 *palmata*. During bacterial phagocytosis, DAO is released into the phagosome, catalyzing the  
523 deamination of DAA which releases hydrogen peroxide and kills the bacteria. This enzyme  
524 may also have greater implications in coral host-microbiome interactions. Beneficial holobiont  
525 bacteria have been shown to have resistance to host DAO while also being able to manage levels  
526 through the TLR-to-NF-kappa-B pathway [95]. We therefore hypothesize that DAO could have a  
527 dual role in *A. palmata* as it is important in the immune response, as well as maintaining  
528 symbiosis with coral microbial partners as in other organisms [95] with future research needed to  
529 characterize its role.

## 530 Conclusions and future directions

531 Within this study, we present evidence that *A. palmata* initiated an immune response to a  
532 disease challenge assay. We identified genes linked to corals that showed no signs of disease  
533 (Exposed: No transmission) which is a factor to consider when looking at disease resistance.  
534 Furthermore, we identified sets of genes that show high similarity to other coral disease  
535 transcriptomic studies [18-25] when disease signs are visually present (Exposed: Transmission).  
536 Since the response to disease exposure in *A. palmata* is similar to other coral species, we can  
537 now start to explore putative genetic mechanisms which confer genotypic disease resistance, and  
538 mechanisms that could cause increases in disease susceptibility. This work has important

539 implications for restoration practitioners, as it may help increase outplant survival efforts through  
540 development of novel diagnostic markers and identification of genotypic resistance, while also  
541 expanding the current knowledge on the evolutionary history of innate immunity in corals and  
542 invertebrates.

## 543 Acknowledgements

544 We would like to acknowledge the team of field workers who contributed to the field challenge  
545 disease assays which included: Allan Bright, Rachel Pausch, Annie Peterson, Emma  
546 Pontes, and Phil Colburn. We also like to thank the coral nurseries [Coral Restoration  
547 Foundation, Florida Fish and Wildlife Commission, and Dr. Lirman (University of Miami)] for  
548 providing the coral fragments and CRF for permitting work to be conducted in their nursery.

## 549 Author contributions

550 X.M.S., M.W.M., and D.W. designed and performed the field challenge disease assays. B.D.Y,  
551 X.M.S AND N.T.K identified samples to sequence for transcriptomic analysis. B.D.Y and  
552 X.M.S performed laboratory work. B.D.Y performed all bioinformatic analysis, figure and table  
553 preparation, B.D.Y, S.R and N.T.K performed manuscript writing. All authors reviewed drafts of  
554 the paper before submission.

## 555 References

- 556 1. Gardner TA. Long-Term Region-Wide Declines in Caribbean Corals. *Science*. 2003 Aug  
557 15;301(5635):958–60.
- 558 2. Jackson EJ, Donovan M, Cramer K, Lam V, editors. Status and Trends of Caribbean Coral  
559 Reefs: 1970-2012. *Glob Coral Reef Monit Netw*. 2014;
- 560 3. Aronson RB, Precht WF. White-band disease and the changing face of Caribbean coral  
561 reefs. In: Porter, James W., editor. *The Ecology and Etiology of Newly Emerging Marine*  
562 *Diseases* [Internet]. Dordrecht: Springer Netherlands; 2001 [cited 2019 Dec 4]. p. 25–38.  
563 Available from: [http://link.springer.com/10.1007/978-94-017-3284-0\\_2](http://link.springer.com/10.1007/978-94-017-3284-0_2)
- 564 4. National Marine Fisheries Service. Recovery Plan for Elkhorn (*Acropora palmata*) and  
565 Staghorn (*Acropora cervicornis*) Corals. Maryland: National Marine Fisheries Service;  
566 2015.
- 567 5. Bruno JF, Selig ER, Casey KS, Page CA, Willis BL, Harvell CD, et al. Thermal Stress and  
568 Coral Cover as Drivers of Coral Disease Outbreaks. Roberts C, editor. *PLoS Biol*. 2007  
569 May 8;5(6):e124.
- 570 6. Burge CA, Mark Eakin C, Friedman CS, Froelich B, Hershberger PK, Hofmann EE, et al.  
571 Climate Change Influences on Marine Infectious Diseases: Implications for Management  
572 and Society. *Annu Rev Mar Sci*. 2014 Jan 3;6(1):249–77.
- 573 7. Cohen R, James C, Lee A, Martinelli M, Muraoka W, Ortega M, et al. Marine Host-  
574 Pathogen Dynamics: Influences of Global Climate Change. *Oceanography* [Internet]. 2018  
575 Jun 1 [cited 2019 Dec 4];31(2). Available from: [https://tos.org/oceanography/article/marine-](https://tos.org/oceanography/article/marine-host-pathogen-dynamics-influences-of-global-climate-change)  
576 [host-pathogen-dynamics-influences-of-global-climate-change](https://tos.org/oceanography/article/marine-host-pathogen-dynamics-influences-of-global-climate-change)
- 577 8. Lafferty KD, Porter JW, Ford SE. Are Diseases Increasing in the Ocean? *Annu Rev Ecol*  
578 *Evol Syst*. 2004 Dec 15;35(1):31–54.
- 579 9. Ward JR, Lafferty KD. The Elusive Baseline of Marine Disease: Are Diseases in Ocean  
580 Ecosystems Increasing? Larry Crowder, editor. *PLoS Biol*. 2004 Apr 13;2(4): e120.
- 581 10. Tracy AM, Pielmeier ML, Yoshioka RM, Heron SF, Harvell CD. Increases and decreases in  
582 marine disease reports in an era of global change. *Proc R Soc B Biol Sci*. 2019 Oct  
583 9;286(1912):20191718.
- 584 11. Bourne DG, Garren M, Work TM, Rosenberg E, Smith GW, Harvell CD. Microbial disease  
585 and the coral holobiont. *Trends Microbiol*. 2009 Dec;17(12):554–62.
- 586 12. Mera H, Bourne DG. Disentangling causation: complex roles of coral-associated  
587 microorganisms in disease: Disentangling coral disease causation. *Environ Microbiol*. 2018  
588 Feb;20(2):431–49.
- 589 13. Kemp KM, Westrich JR, Alabady MS, Edwards ML, Lipp EK. Abundance and Multilocus  
590 Sequence Analysis of *Vibrio* Bacteria Associated with Diseased Elkhorn Coral (*Acropora*  
591 *palmata*) of the Florida Keys. Stams AJM, editor. *Appl Environ Microbiol*. 2017 Oct  
592 27;84(2): e01035-17.
- 593 14. Sutherland KP, Porter JW, Turner JW, Thomas BJ, Looney EE, Luna TP, et al. Human

- 594 sewage identified as likely source of white pox disease of the threatened Caribbean  
595 elkhorn coral, *Acropora palmata*: Likely human sewage source of white pox disease of  
596 elkhorn coral. *Environ Microbiol.* 2010 Feb 2;12(5):1122–31.
- 597 15. Lesser MP, Jarett JK. Culture-dependent and culture-independent analyses reveal no  
598 prokaryotic community shifts or recovery of *Serratia marcescens* in *Acropora palmata* with  
599 white pox disease. *FEMS Microbiol Ecol.* 2014 Jun;88(3):457–67.
- 600 16. Sutherland KP, Berry B, Park A, Kemp DW, Kemp KM, Lipp EK, et al. Shifting white pox  
601 aetiologies affecting *Acropora palmata* in the Florida Keys, 1994–2014. *Philos Trans R Soc  
602 B Biol Sci.* 2016 Mar 5;371(1689):20150205.
- 603 17. Thompson JR, Rivera HE, Closek CJ, Medina M. Microbes in the coral holobiont: partners  
604 through evolution, development, and ecological interactions. *Front Cell Infect Microbiol*  
605 [Internet]. 2015 Jan 7 [cited 2019 Dec 5];4. Available from:  
606 <http://journal.frontiersin.org/article/10.3389/fcimb.2014.00176/abstract>
- 607 18. Anderson DA, Walz ME, Weil E, Tonellato P, Smith MC. RNA-Seq of the Caribbean reef-  
608 building coral *Orbicella faveolata* (Scleractinia-Merulinidae) under bleaching and disease  
609 stress expands models of coral innate immunity. *PeerJ.* 2016 Feb 15;4: e1616.
- 610 19. Closek CJ, Sunagawa S, DeSalvo MK, Piceno YM, DeSantis TZ, Brodie EL, et al. Coral  
611 transcriptome and bacterial community profiles reveal distinct Yellow Band Disease states  
612 in *Orbicella faveolata*. *ISME J.* 2014 Dec;8(12):2411–22.
- 613 20. Daniels CA, Baumgarten S, Yum LK, Michell CT, Bayer T, Arif C, et al. Metatranscriptome  
614 analysis of the reef-building coral *Orbicella faveolata* indicates holobiont response to coral  
615 disease. *Front Mar Sci* [Internet]. 2015 Sep 11 [cited 2019 Dec 4];2. Available from:  
616 <http://journal.frontiersin.org/Article/10.3389/fmars.2015.00062/abstract>
- 617 21. Fuess LE, Mann WT, Jinks LR, Brinkhuis V, Mydlarz LD. Transcriptional analyses provide  
618 new insight into the late-stage immune response of a diseased Caribbean coral. *R Soc  
619 Open Sci.* 2018 May;5(5):172062.
- 620 22. Libro S, Kaluziak ST, Vollmer SV. RNA-seq Profiles of Immune Related Genes in the  
621 Staghorn Coral *Acropora cervicornis* Infected with White Band Disease. Söderhäll K,  
622 editor. *PLoS ONE.* 2013 Nov 21;8(11): e81821.
- 623 23. Libro S, Vollmer SV. Genetic Signature of Resistance to White Band Disease in the  
624 Caribbean Staghorn Coral *Acropora cervicornis*. Melzner F, editor. *PLOS ONE.* 2016 Jan  
625 19;11(1): e0146636.
- 626 24. Ocampo ID, Zárate-Potes A, Pizarro V, Rojas CA, Vera NE, Cadavid LF. The  
627 immunotranscriptome of the Caribbean reef-building coral *Pseudodiploria strigosa*.  
628 *Immunogenetics.* 2015 Sep;67(9):515–30.
- 629 25. Wright RM, Aglyamova GV, Meyer E, Matz MV. Gene expression associated with white  
630 syndromes in a reef building coral, *Acropora hyacinthus*. *BMC Genomics.* 2015  
631 Dec;16(1):371.
- 632 26. Mydlarz LD, McGinty ES, Harvell CD. What are the physiological and immunological  
633 responses of coral to climate warming and disease? *J Exp Biol.* 2010 Mar 15;213(6):934–  
634 45.
- 635 27. Palmer CV. Immunity and the coral crisis. *Commun Biol.* 2018 Dec;1(1):91.

- 636 28. Palmer CV, Traylor-Knowles N. Towards an integrated network of coral immune  
637 mechanisms. *Proc R Soc B Biol Sci.* 2012 Oct 22;279(1745):4106–14.
- 638 29. Toledo-Hernández C, Ruiz-Diaz C. The immune responses of the coral. *Invertebr Surviv J.*  
639 2014;11(1):319–28.
- 640 30. Miller MW, Colburn PJ, Pontes E, Williams DE, Bright AJ, Serrano XM, et al. Genotypic  
641 variation in disease susceptibility among cultured stocks of elkhorn and staghorn corals.  
642 *PeerJ.* 2019 Apr 8;7:e6751.
- 643 31. Conesa A, Madrigal P, Tarazona S, Gomez-Cabrero D, Cervera A, McPherson A, et al. A  
644 survey of best practices for RNA-seq data analysis. *Genome Biol.* 2016 Dec;17(1):13.
- 645 32. Andrews S. FastQC: a quality control tool for high throughput sequence data.  
646 <http://www.bioninformatics.babraham.ac.uk/projects/fastqc>. 2010.
- 647 33. Bolger AM, Lohse M, Usadel B. Trimmomatic: a flexible trimmer for Illumina sequence  
648 data. *Bioinformatics.* 2014 Aug 1;30(15):2114–20.
- 649 34. Kitchen SA, Ratan A, Bedoya-Reina OC, Burhans R, Fogarty ND, Miller W, et al. Genomic  
650 Variants Among Threatened *Acropora* Corals. 2019 Mar 26;14.
- 651 35. Dobin A, Davis CA, Schlesinger F, Drenkow J, Zaleski C, Jha S, et al. STAR: ultrafast  
652 universal RNA-seq aligner. *Bioinformatics.* 2013 Jan;29(1):15–21.
- 653 36. Thornhill DJ, LaJeunesse TC, Kemp DW, Fitt WK, Schmidt GW. Multi-year, seasonal  
654 genotypic surveys of coral-algal symbioses reveal prevalent stability or post-bleaching  
655 reversion. *Mar Biol.* 2006 Feb;148(4):711–22.
- 656 37. Bayer T, Aranda M, Sunagawa S, Yum LK, DeSalvo MK, Lindquist E, et al. Symbiodinium  
657 Transcriptomes: Genome Insights into the Dinoflagellate Symbionts of Reef-Building  
658 Corals. Moustafa A, editor. *PLoS ONE.* 2012 Apr 18;7(4):e35269.
- 659 38. Patro R, Duggal G, Love MI, Irizarry RA, Kingsford C. Salmon provides fast and bias-  
660 aware quantification of transcript expression. *Nat Methods.* 2017 Apr;14(4):417–9.
- 661 39. Sonesson C, Love MI, Robinson MD. Differential analyses for RNA-seq: transcript-level  
662 estimates improve gene-level inferences. *F1000Research.* 2015;4.
- 663 40. Robinson MD, McCarthy DJ, Smyth GK. edgeR: a Bioconductor package for differential  
664 expression analysis of digital gene expression data. *Bioinformatics.* 2010 Jan 1;26(1):139–  
665 40.
- 666 41. Wickham H. *ggplot2: Elegant Graphics for Data Analysis* [Internet]. New York: Springer-  
667 Verlag; 2016. Available from: <https://ggplot2.tidyverse.org>
- 668 42. Ritchie ME, Phipson B, Wu D, Hu Y, Law CW, Shi W, et al. Limma powers differential  
669 expression analyses for RNA-sequencing and microarray studies. *Nucleic Acids Res.* 2015  
670 Apr 20;43(7):e47–e47.
- 671 43. Langfelder P, Horvath S. WGCNA: an R package for weighted correlation network  
672 analysis. *BMC Bioinformatics.* 2008 Dec;9(1):559.
- 673 44. Shannon P. Cytoscape: A Software Environment for Integrated Models of Biomolecular  
674 Interaction Networks. *Genome Res.* 2003 Nov 1;13(11):2498–504.
- 675 45. Maere S, Heymans K, Kuiper M. BiNGO: a Cytoscape plugin to assess overrepresentation



- 676 of Gene Ontology categories in Biological Networks. *Bioinformatics*. 2005 Aug  
677 15;21(16):3448–9.
- 678 46. Gu Z, Eils R, Schlesner M. Complex heatmaps reveal patterns and correlations in  
679 multidimensional genomic data. *Bioinformatics*. 2016 Sep 15;32(18):2847–9.
- 680 47. Sato Y, Bourne DG, Willis BL. Effects of temperature and light on the progression of black  
681 band disease on the reef coral, *Montiporahispida*. *Coral Reefs*. 2011 Sep;30(3):753.
- 682 48. Cheng Z, Mugler CF, Keskin A, Hodapp S, Chan LY-L, Weis K, et al. Small and Large  
683 Ribosomal Subunit Deficiencies Lead to Distinct Gene Expression Signatures that Reflect  
684 Cellular Growth Rate. *Mol Cell*. 2019 Jan;73(1):36–47.e10.
- 685 49. Muñoz A, Castellano MM. Regulation of Translation Initiation under Abiotic Stress  
686 Conditions in Plants: Is it a Conserved or Not so Conserved Process among Eukaryotes?  
687 *Comp Funct Genomics*. 2012;2012:1–8.
- 688 50. Allen AE, LaRoche J, Maheswari U, Lommer M, Schauer N, Lopez PJ, et al. Whole-cell  
689 response of the pennate diatom *Phaeodactylum tricornutum* to iron starvation. *Proc Natl  
690 Acad Sci*. 2008 Jul 29;105(30):10438–43.
- 691 51. Horchani F, Hajri R, Aschi-Smiti S. Effect of ammonium or nitrate nutrition on  
692 photosynthesis, growth, and nitrogen assimilation in tomato plants. *J Plant Nutr Soil Sci*.  
693 2010 Aug;173(4):610–7.
- 694 52. Summons R E, Boag T S, Osmond C B. The effect of ammonium on photosynthesis and  
695 the pathway of ammonium assimilation in *Gymnodinium microadriaticum in vitro* and in  
696 symbiosis with tridacnid clams and corals. *Proc R Soc Lond B Biol Sci*. 1986 Mar  
697 22;227(1247):147–59.
- 698 53. van Oijen T, van Leeuwe MA, Gieskes WW, de Baar HJ. Effects of iron limitation on  
699 photosynthesis and carbohydrate metabolism in the Antarctic diatom *Chaetoceros brevis*  
700 (Bacillariophyceae). *Eur J Phycol*. 2004 May;39(2):161–71.
- 701 54. Yellowlees D, Rees TAV, Leggat W. Metabolic interactions between algal symbionts and  
702 invertebrate hosts. *Plant Cell Environ*. 2008 May;31(5):679–94.
- 703 55. Muscatine L. The role of symbiotic algae in carbon and energy flux in reef corals. *Coral  
704 Reefs*. 1990;25:1–29.
- 705 56. Morris LA, Voolstra CR, Quigley KM, Bourne DG, Bay LK. Nutrient Availability and  
706 Metabolism Affect the Stability of Coral–Symbiodiniaceae Symbioses. *Trends Microbiol*.  
707 2019 Aug;27(8):678–89.
- 708 57. Lapointe BE, Barile PJ, Matzie WR. Anthropogenic nutrient enrichment of seagrass and  
709 coral reef communities in the Lower Florida Keys: discrimination of local versus regional  
710 nitrogen sources. *J Exp Mar Biol Ecol*. 2004 Sep;308(1):23–58.
- 711 58. Lapointe BE, Tomasko DA, Matzie WR. Eutrophication and Trophic State Classification of  
712 Seagrass Communities in the Florida Keys. 1994;23.
- 713 59. Vega Thurber RL, Burkepille DE, Fuchs C, Shantz AA, McMinds R, Zaneveld JR. Chronic  
714 nutrient enrichment increases prevalence and severity of coral disease and bleaching.  
715 *Glob Change Biol*. 2014 Feb;20(2):544–54.
- 716 60. Barshis DJ, Ladner JT, Oliver TA, Seneca FO, Traylor-Knowles N, Palumbi SR. Genomic

- 717 basis for coral resilience to climate change. *Proc Natl Acad Sci.* 2013 Jan 22;110(4):1387–  
718 92.
- 719 61. Desalvo MK, Voolstra CR, Sunagawa S, Schwarz JA, Stillman JH, Coffroth MA, et al.  
720 Differential gene expression during thermal stress and bleaching in the Caribbean coral  
721 *Montastraea faveolata*. *Mol Ecol.* 2008 Sep;17(17):3952–71.
- 722 62. Gates RD, Baghdasarian G, Muscatine L. Temperature Stress Causes Host Cell  
723 Detachment in Symbiotic Cnidarians: Implications for Coral Bleaching. *Biol Bull.* 1992  
724 Jun;182(3):324–32.
- 725 63. Traylor-Knowles N. Heat stress compromises epithelial integrity in the coral, *Acropora*  
726 *hyacinthus*. *PeerJ.* 2019 Feb 26;7:e6510.
- 727 64. Nie L, Cai S-Y, Shao J-Z, Chen J. Toll-Like Receptors, Associated Biological Roles, and  
728 Signaling Networks in Non-Mammals. *Front Immunol.* 2018 Jul 2;9:1523.
- 729 65. Rauta PR, Samanta M, Dash HR, Nayak B, Das S. Toll-like receptors (TLRs) in aquatic  
730 animals: Signaling pathways, expressions and immune responses. *Immunol Lett.* 2014  
731 Mar;158(1–2):14–24.
- 732 66. Huang B, Zhang L, Xu F, Tang X, Li L, Wang W, et al. Oyster Versatile IKK $\alpha$ / $\beta$ s Are  
733 Involved in Toll-Like Receptor and RIG-I-Like Receptor Signaling for Innate Immune  
734 Response. *Front Immunol.* 2019 Jul 31;10:1826.
- 735 67. Priyathilaka TT, Bathige SDNK, Lee S, Nam B-H, Lee J. Transcriptome-wide identification,  
736 functional characterization, and expression analysis of two novel invertebrate-type Toll-like  
737 receptors from disk abalone (*Haliotis discus discus*). *Fish Shellfish Immunol.* 2019  
738 Jan;84:802–15.
- 739 68. Williams LM, Fuess LE, Brennan JJ, Mansfield KM, Salas-Rodriguez E, Welsh J, et al. A  
740 conserved Toll-like receptor-to-NF- $\kappa$ B signaling pathway in the endangered coral *Orbicella*  
741 *faveolata*. *Dev Comp Immunol.* 2018 Feb;79:128–36.
- 742 69. Akira S, Uematsu S, Takeuchi O. Pathogen Recognition and Innate Immunity. *Cell.* 2006  
743 Feb;124(4):783–801.
- 744 70. Kawai T. Toll-like receptor signaling pathways. *Front Immunol.* :8.
- 745 71. Kawai T, Akira S. Signaling to NF- $\kappa$ B by Toll-like receptors. *Trends Mol Med.* 2007  
746 Nov;13(11):460–9.
- 747 72. Baron OL, Deleury E, Reichhart J-M, Coustau C. The LBP/BPI multigenic family in  
748 invertebrates: Evolutionary history and evidences of specialization in mollusks. *Dev Comp*  
749 *Immunol.* 2016 Apr;57:20–30.
- 750 73. Gonzalez M, Gueguen Y, Destoumieux-Garzon D, Romestand B, Fievet J, Pugniere M, et  
751 al. Evidence of a bactericidal permeability increasing protein in an invertebrate, the  
752 *Crassostrea gigas* Cg-BPI. *Proc Natl Acad Sci.* 2007 Nov 6;104(45):17759–64.
- 753 74. Hu B, Wen C, Zhang M, Jian S, Yang G. Identification and characterization of two LBP/BPI  
754 genes involved in innate immunity from *Hyriopsis cumingii*. *Fish Shellfish Immunol.* 2017  
755 Jan;60:436–46.
- 756 75. Mao Y, Zhou C, Zhu L, Huang Y, Yan T, Fang J, et al. Identification and expression  
757 analysis on bactericidal permeability-increasing protein (BPI)/lipopolysaccharide-binding



- 758 protein (LBP) of ark shell, *Scapharca broughtonii*. *Fish Shellfish Immunol.* 2013  
759 Sep;35(3):642–52.
- 760 76. Shao Y, Li C, Che Z, Zhang P, Zhang W, Duan X, et al. Cloning and characterization of  
761 two lipopolysaccharide-binding protein/bactericidal permeability-increasing protein  
762 (LBP/BPI) genes from the sea cucumber *Apostichopus japonicus* with diversified function  
763 in modulating ROS production. *Dev Comp Immunol.* 2015 Sep;52(1):88–97.
- 764 77. Ehara T, Kitajima S, Kanzawa N, Tamiya T, Tsuchiya T. Antimicrobial action of achacin is  
765 mediated by L-amino acid oxidase activity. *FEBS Lett.* 2002 Nov 20;531(3):509–12.
- 766 78. Hisako Otsuka-Fuchino, Yoichi Watanabe, Chikako Hirakawa, Toru Tamiya, Matsumoto  
767 JJ, Takahide Tsuchiya. Bactericidal action of a glycoprotein from the body surface mucus  
768 of giant African snail. *Comp Biochem Physiol Part C Comp Pharmacol.* 1992  
769 Apr;101(3):607–13.
- 770 79. Obara K, Otsuka-Fuchino H, Sattayasai N, Nonomura Y, Tsuchiya T, Tamiya T. Molecular  
771 cloning of the antibacterial protein of the giant African snail, *Achatina fulica* Ferussac. *Eur J*  
772 *Biochem.* 1992 Oct;209(1):1–6.
- 773 80. van Oppen MJH, McDonald BJ, Willis B, Miller DJ. The Evolutionary History of the Coral  
774 Genus *Acropora* (Scleractinia, Cnidaria) Based on a Mitochondrial and a Nuclear Marker:  
775 Reticulation, Incomplete Lineage Sorting, or Morphological Convergence? *Mol Biol Evol.*  
776 2001 Jul 1;18(7):1315–29.
- 777 81. Kvennefors ECE, Leggat W, Hoegh-Guldberg O, Degnan BM, Barnes AC. An ancient and  
778 variable mannose-binding lectin from the coral *Acropora millepora* binds both pathogens  
779 and symbionts. *Dev Comp Immunol.* 2008 Jan;32(12):1582–92.
- 780 82. Weis VM. Cell Biology of Coral Symbiosis: Foundational Study Can Inform Solutions to the  
781 Coral Reef Crisis. *Integr Comp Biol.* 2019 Oct 1;59(4):845–55.
- 782 83. Wood-Charlson EM, Hollingsworth LL, Krupp DA, Weis VM. Lectin/glycan interactions play  
783 a role in recognition in a coral/dinoflagellate symbiosis. *Cell Microbiol.* 2006  
784 Dec;8(12):1985–93.
- 785 84. van de Water JAJM, Lamb JB, van Oppen MJH, Willis BL, Bourne DG. Comparative  
786 immune responses of corals to stressors associated with offshore reef-based tourist  
787 platforms. *Conserv Physiol.* 2015;3(1):cov032.
- 788 85. Thompson RW, Pesce JT, Ramalingam T, Wilson MS, White S, Cheever AW, et al.  
789 Cationic Amino Acid Transporter-2 Regulates Immunity by Modulating Arginase Activity.  
790 Pearce EJ, editor. *PLoS Pathog.* 2008 Mar 14;4(3):e1000023.
- 791 86. Byeon SE, Yi Y-S, Oh J, Yoo BC, Hong S, Cho JY. The Role of Src Kinase in  
792 Macrophage-Mediated Inflammatory Responses. *Mediators Inflamm.* 2012;2012:1–18.
- 793 87. Thakur N, Hentschel U, Krasko A, Pabel C, Anil A, Müller W. Antibacterial activity of the  
794 sponge *Suberites domuncula* and its primmorphs: potential basis for epibacterial chemical  
795 defense. *Aquat Microb Ecol.* 2003;31:77–83.
- 796 88. Wiens M, Korzhev M, Krasko A, Thakur NL, Perović-Ottstadt S, Breter HJ, et al. Innate  
797 Immune Defense of the Sponge *Suberites domuncula* against Bacteria Involves a MyD88-  
798 dependent Signaling Pathway: INDUCTION OF A PERFORIN-LIKE MOLECULE. *J Biol*  
799 *Chem.* 2005 Jul 29;280(30):27949–59.

- 800 89. Hubler MJ, Kennedy AJ. Role of lipids in the metabolism and activation of immune cells. *J*  
801 *Nutr Biochem.* 2016 Aug;34:1–7.
- 802 90. Baumann J, Grottoli AG, Hughes AD, Matsui Y. Photoautotrophic and heterotrophic carbon  
803 in bleached and non-bleached coral lipid acquisition and storage. *J Exp Mar Biol Ecol.*  
804 2014 Dec;461:469–78.
- 805 91. Rodrigues LJ, Grottoli AG. Energy reserves and metabolism as indicators of coral recovery  
806 from bleaching. *Limnol Oceanogr.* 2007 Sep;52(5):1874–82.
- 807 92. Tagliafico A, Rudd D, Rangel M, Kelaher B, Christidis L, Cowden K, et al. Lipid-enriched  
808 diets reduce the impacts of thermal stress in corals. *Mar Ecol Prog Ser.* 2017 Jun  
809 21;573:129–41.
- 810 93. Irukayama-Tomobe Y, Tanaka H, Yokomizo T, Hashidate-Yoshida T, Yanagisawa M,  
811 Sakurai T. Aromatic D-amino acids act as chemoattractant factors for human leukocytes  
812 through a G protein-coupled receptor, GPR109B. *Proc Natl Acad Sci.* 2009 Mar  
813 10;106(10):3930–4.
- 814 94. Nakamura H, Fang J, Maeda H. Protective Role of d-Amino Acid Oxidase against  
815 *Staphylococcus aureus* Infection. Blanke SR, editor. *Infect Immun.* 2012 Apr;80(4):1546–  
816 53.
- 817 95. Sasabe J, Miyoshi Y, Rakoff-Nahoum S, Zhang T, Mita M, Davis BM, et al. Interplay  
818 between microbial d-amino acids and host d-amino acid oxidase modifies murine mucosal  
819 defence and gut microbiota. *Nat Microbiol.* 2016 Oct;1(10):16125.
- 820 96. Sasabe J, Suzuki M. Emerging Role of D-Amino Acid Metabolism in the Innate Defense.  
821 *Front Microbiol.* 2018 May 9;9:933.

822

## 823 Supporting Information

824 **Supp 1:** *A. palmata* Principal Component 1 gene loadings and GO list with associated genes.

825 **Supp 2:** Heatmap of *Symbiodiniaceae* genes associated with photosynthetic GO terms.

826 **Supp 3:** *Symbiodiniaceae* Principal Component 1 gene loadings and GO list with associated

827 **genes.** For left heatmap grey = 2016 samples, black = 2017 samples. Fill shows higher (red) to

828 low (blue) gene counts using a variance stabilizing transformation. Column dendrogram shows

829 hierarchical clustering of samples. Rows (genes) also arranged using hierarchical clustering with

830 dendrogram omitted. Right heatmap is presence (black) and absence (white) of genes to GO  
831 terms.

832 **Supp 4: Baseline VS Exposed: No Transmission DeSeq2 results and significant GO terms**  
833 **with associated genes.**

834 **Supp 5: Baseline VS Exposed: Transmission DeSeq2 results and significant GO terms with**  
835 **associated genes.**

836 **Supp 6: Shared genes between DeSeq2 contrasts.**

837 **Supp 7: Coexpression heatmap for the 19 modules identified from WGCNA analysis.**

838 Heatmap fill shows positive (red) to negative correlation (blue). The top number in each cell  
839 shows the correlation strength, and the bottom number shows module significance to Baseline or  
840 disease outcomes.

841 **Supp 8: Gene lists for significant modules from WGCNA analysis.**

842 **Supp 9: GO terms and associated genes for significant WGCNA modules.**

A)

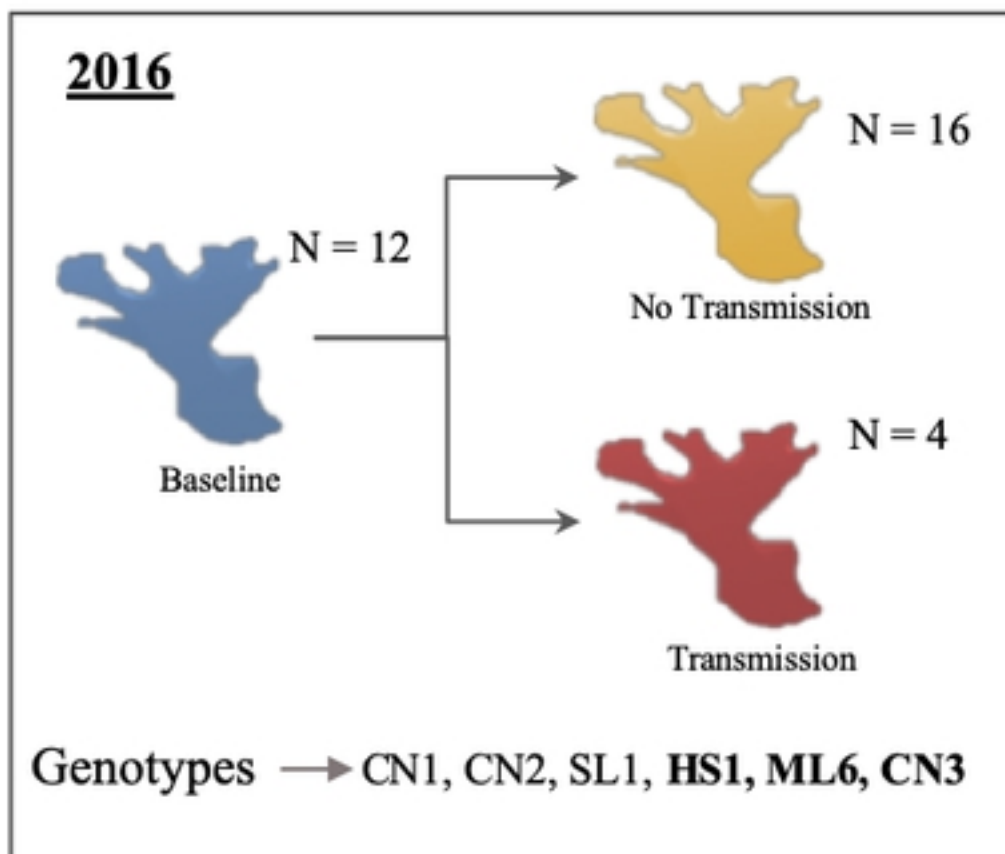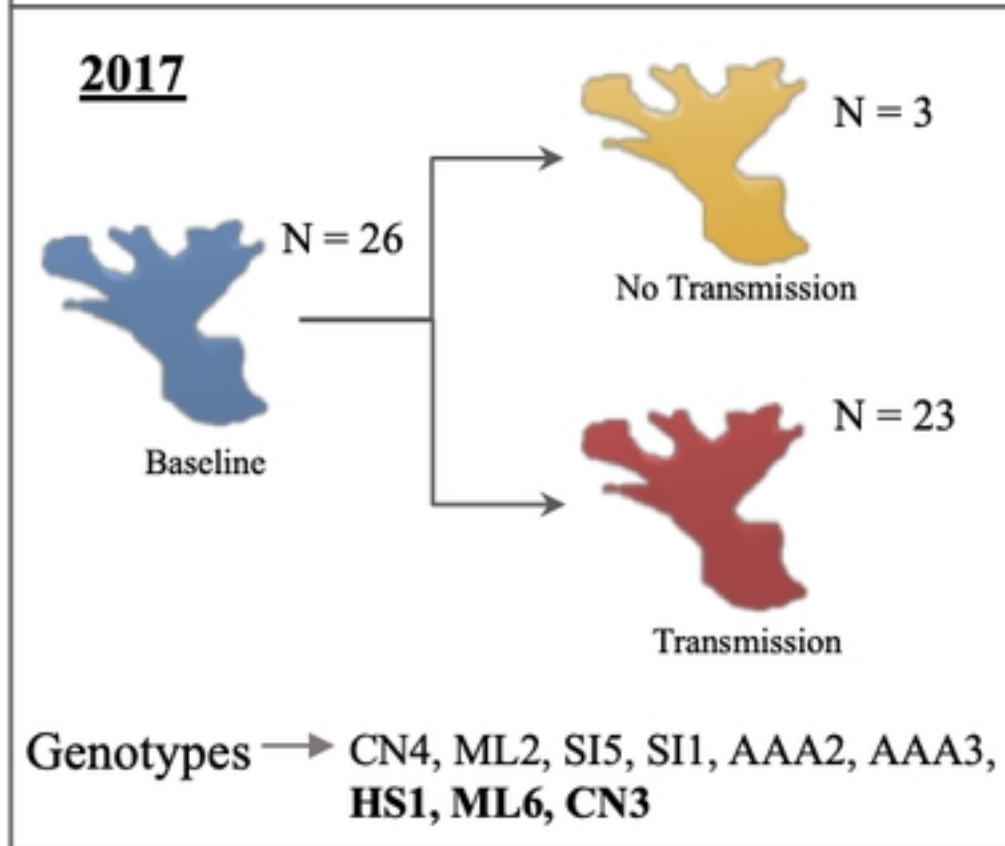

B)

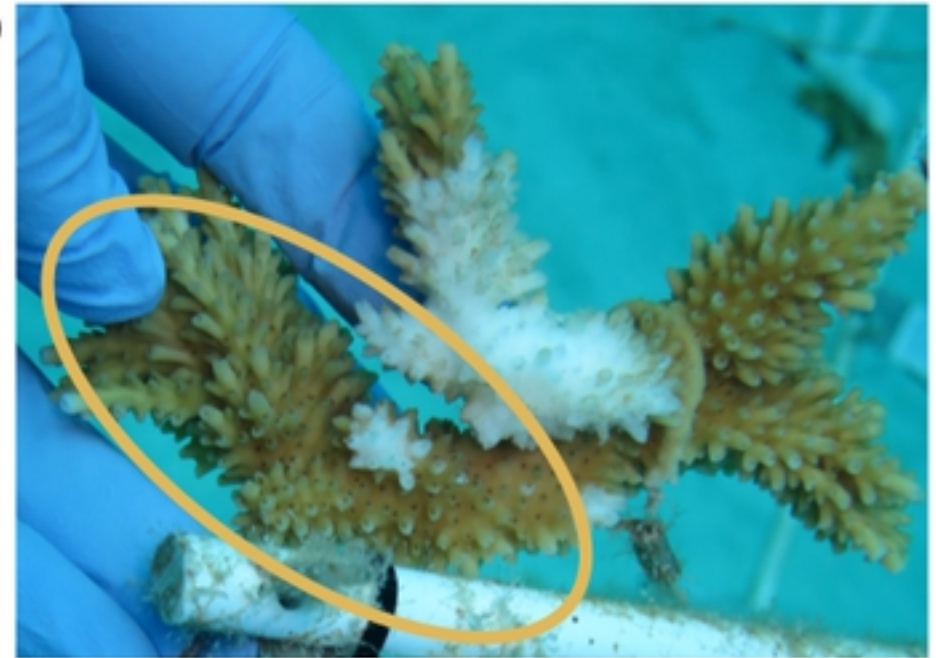

C)

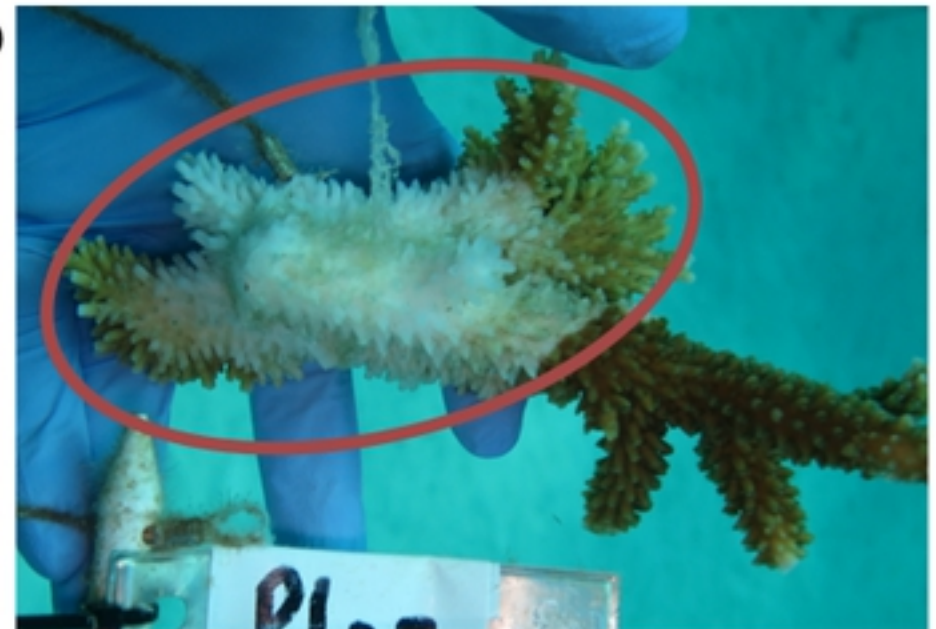

Fig1

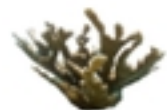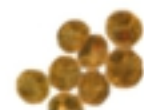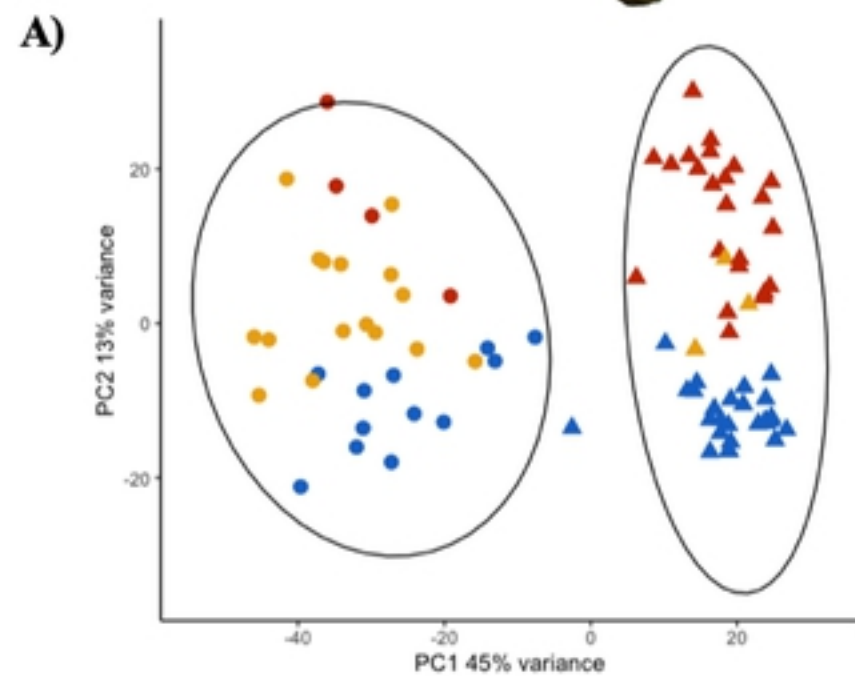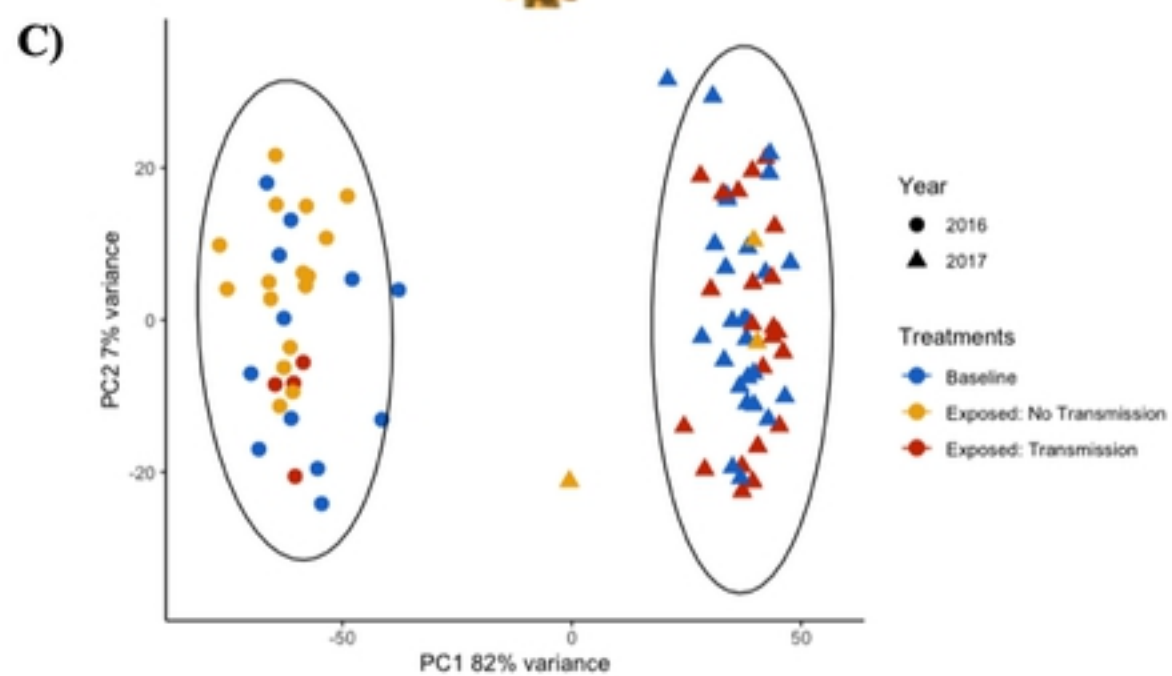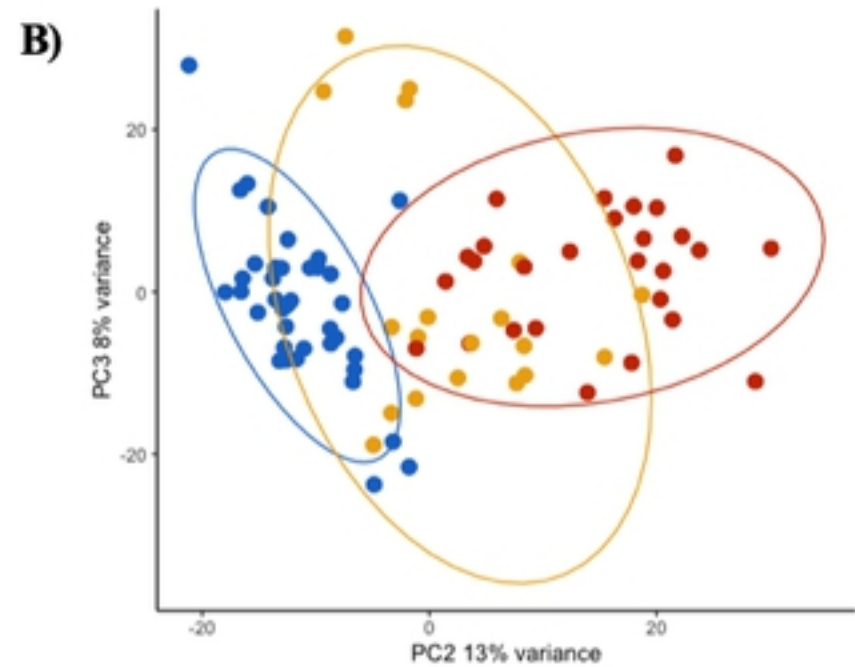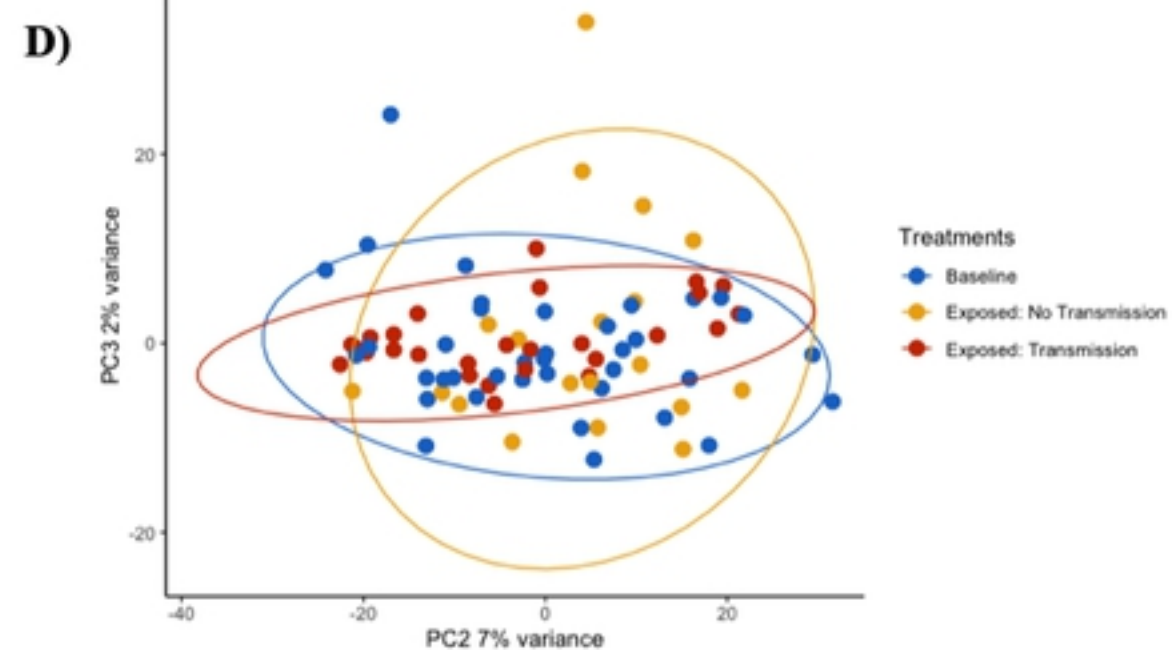

Fig2





A) Baseline Vs No Transmission

↑ 676  
↓ 139

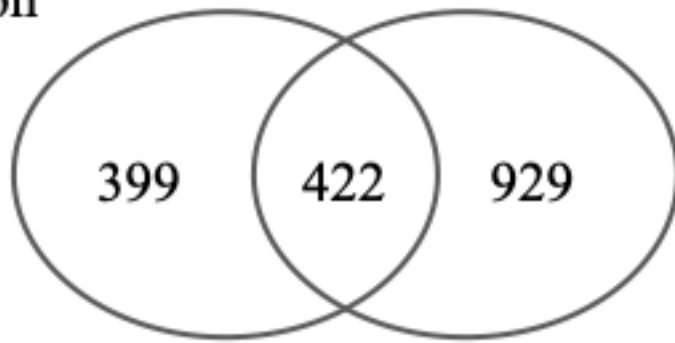

Baseline Vs Transmission

678 ↑  
673 ↓

B)

Sample

bioRxiv preprint doi: <https://doi.org/10.1101/2020.01.20.912410>; this version posted January 20, 2020. The copyright holder for this preprint (which was not certified by peer review) is the author/funder. This article is a US Government work. It is not subject to copyright under 17 USC 105 and is also made available for use under a CC0 license.

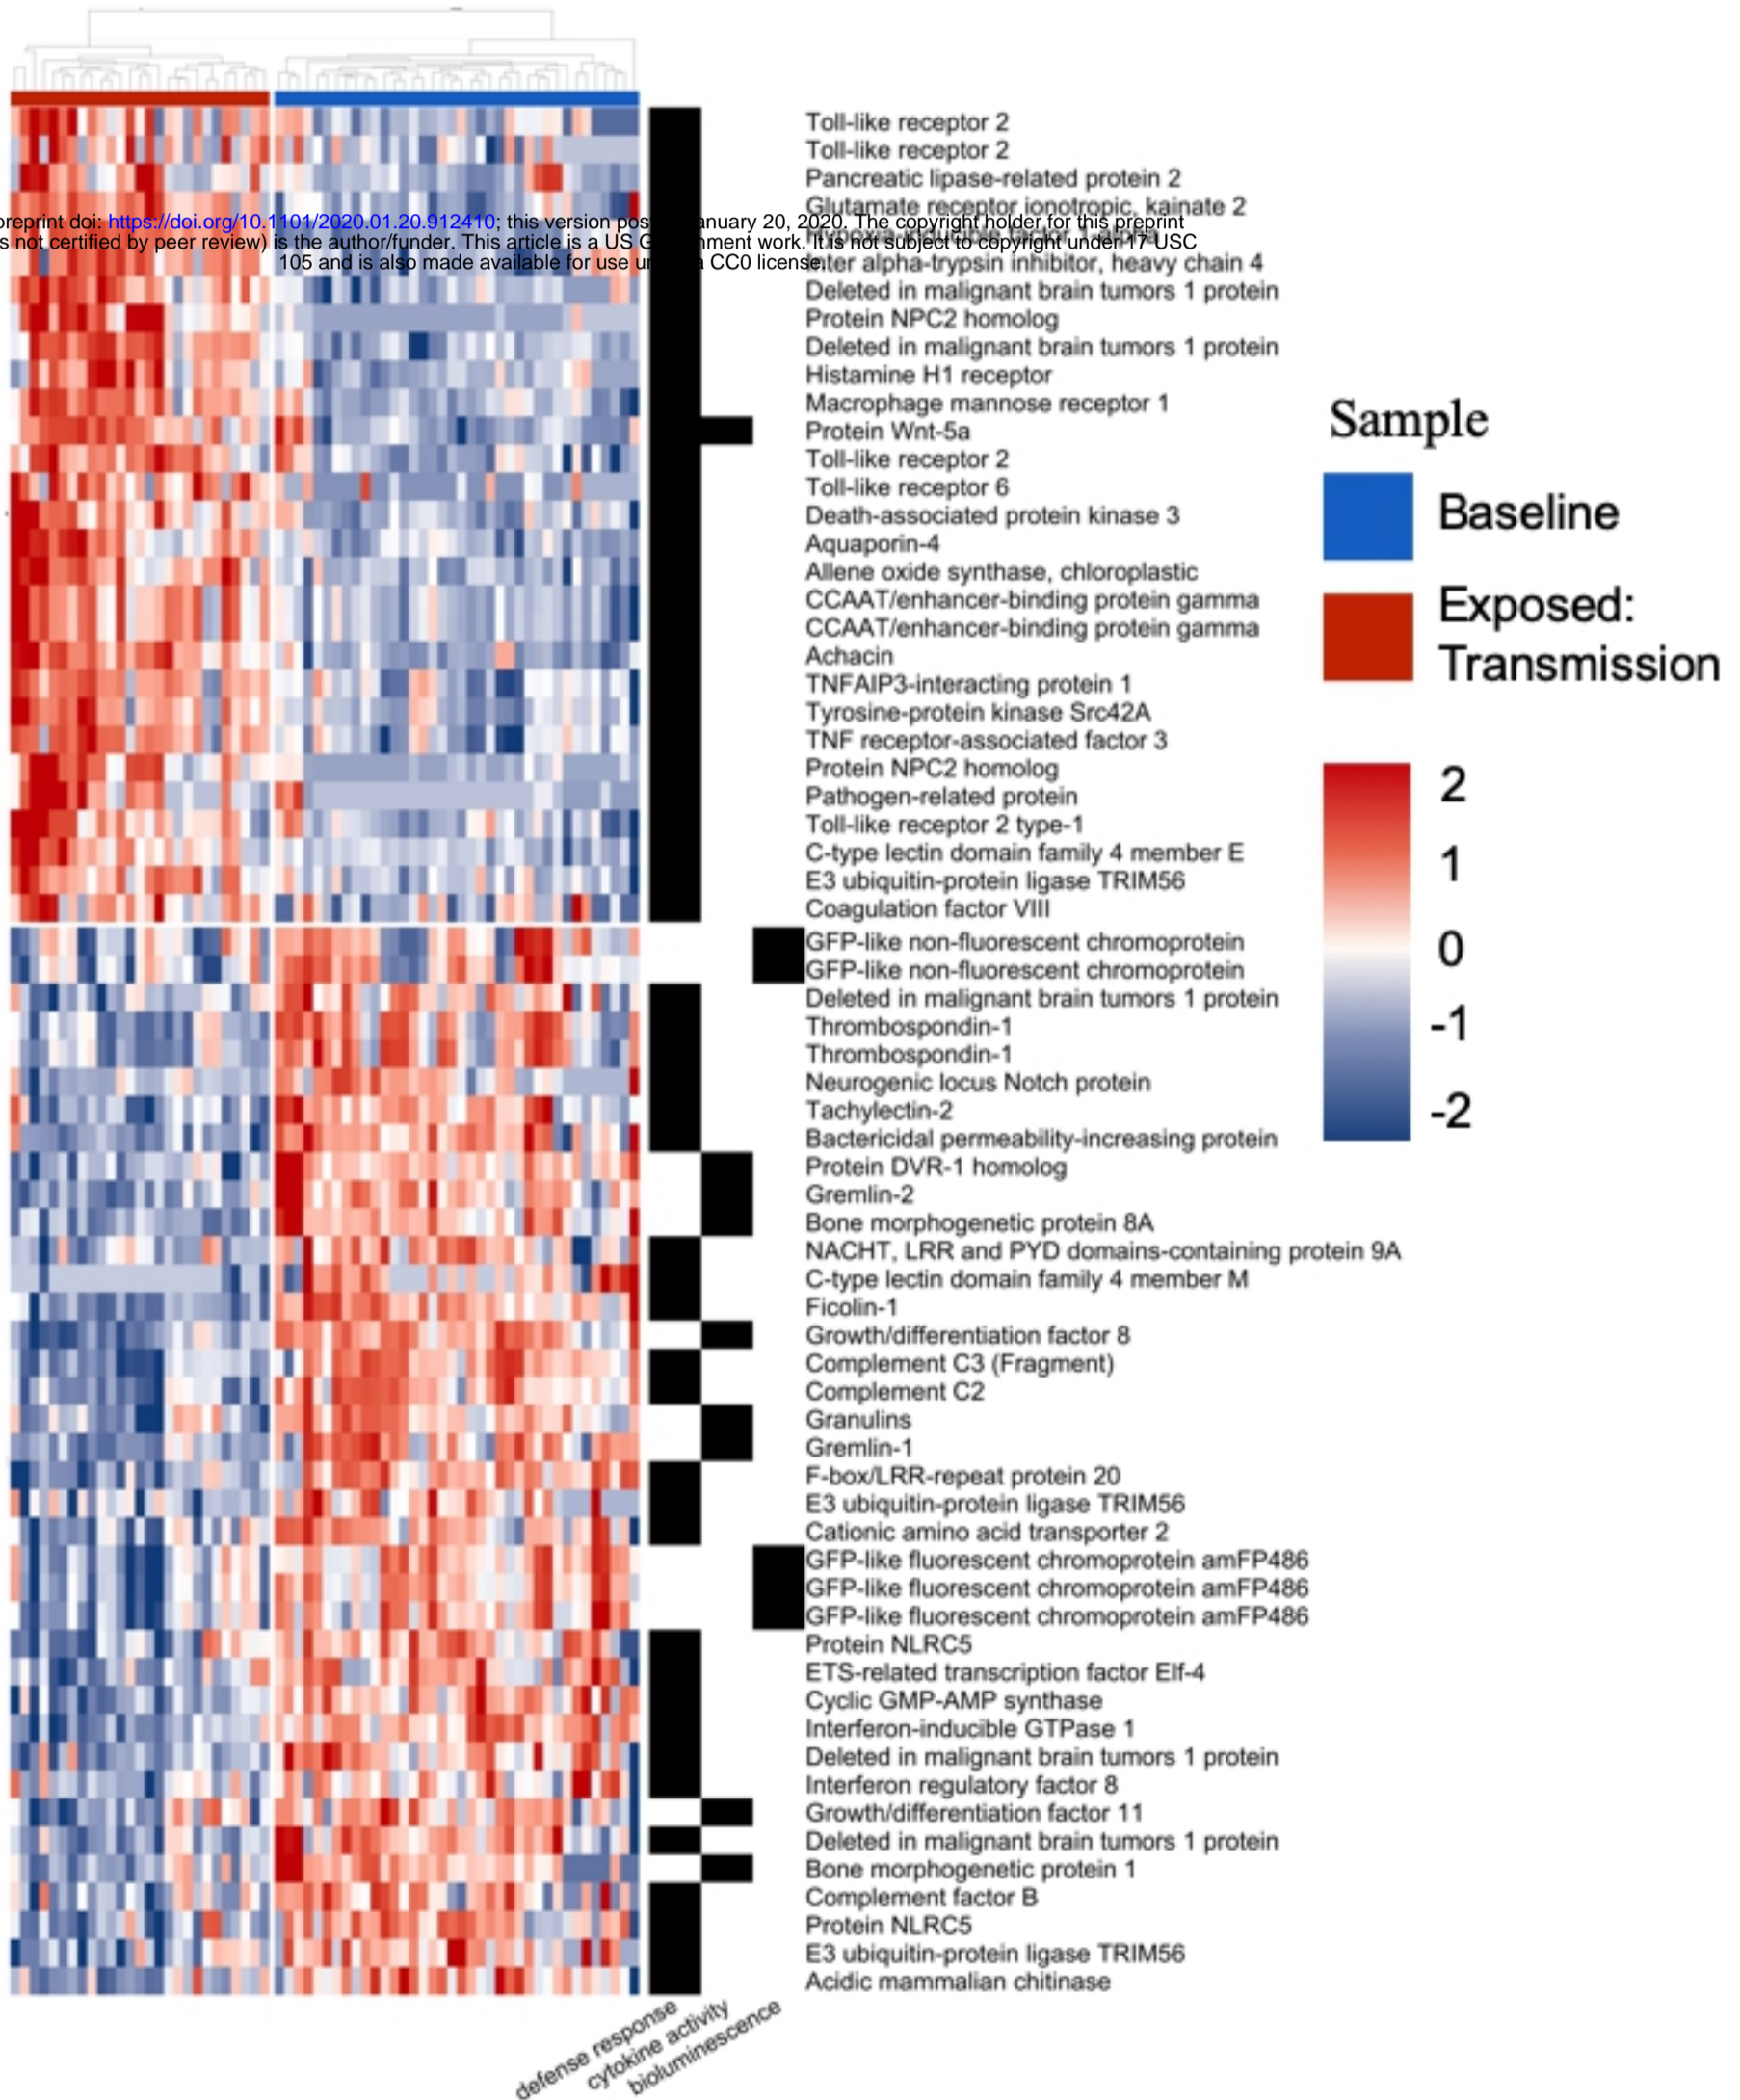

Fig4



A)

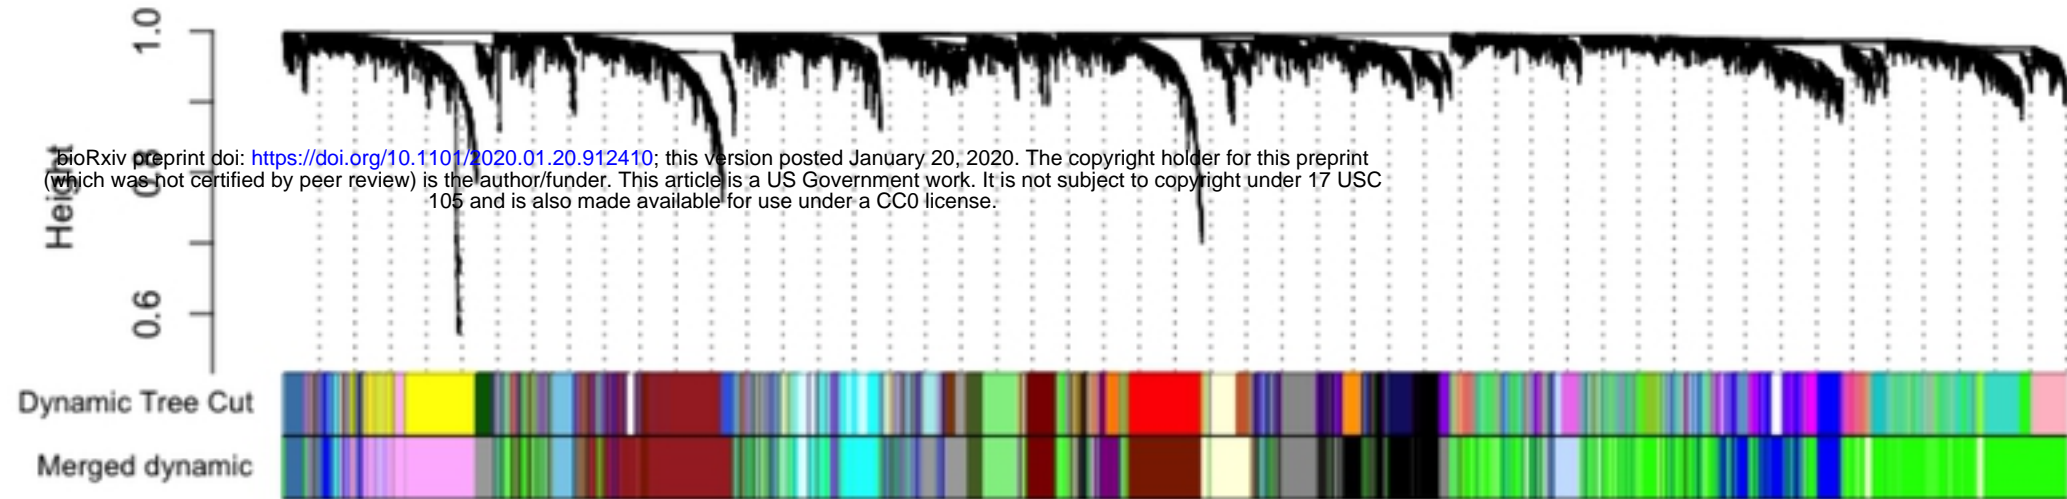

B)

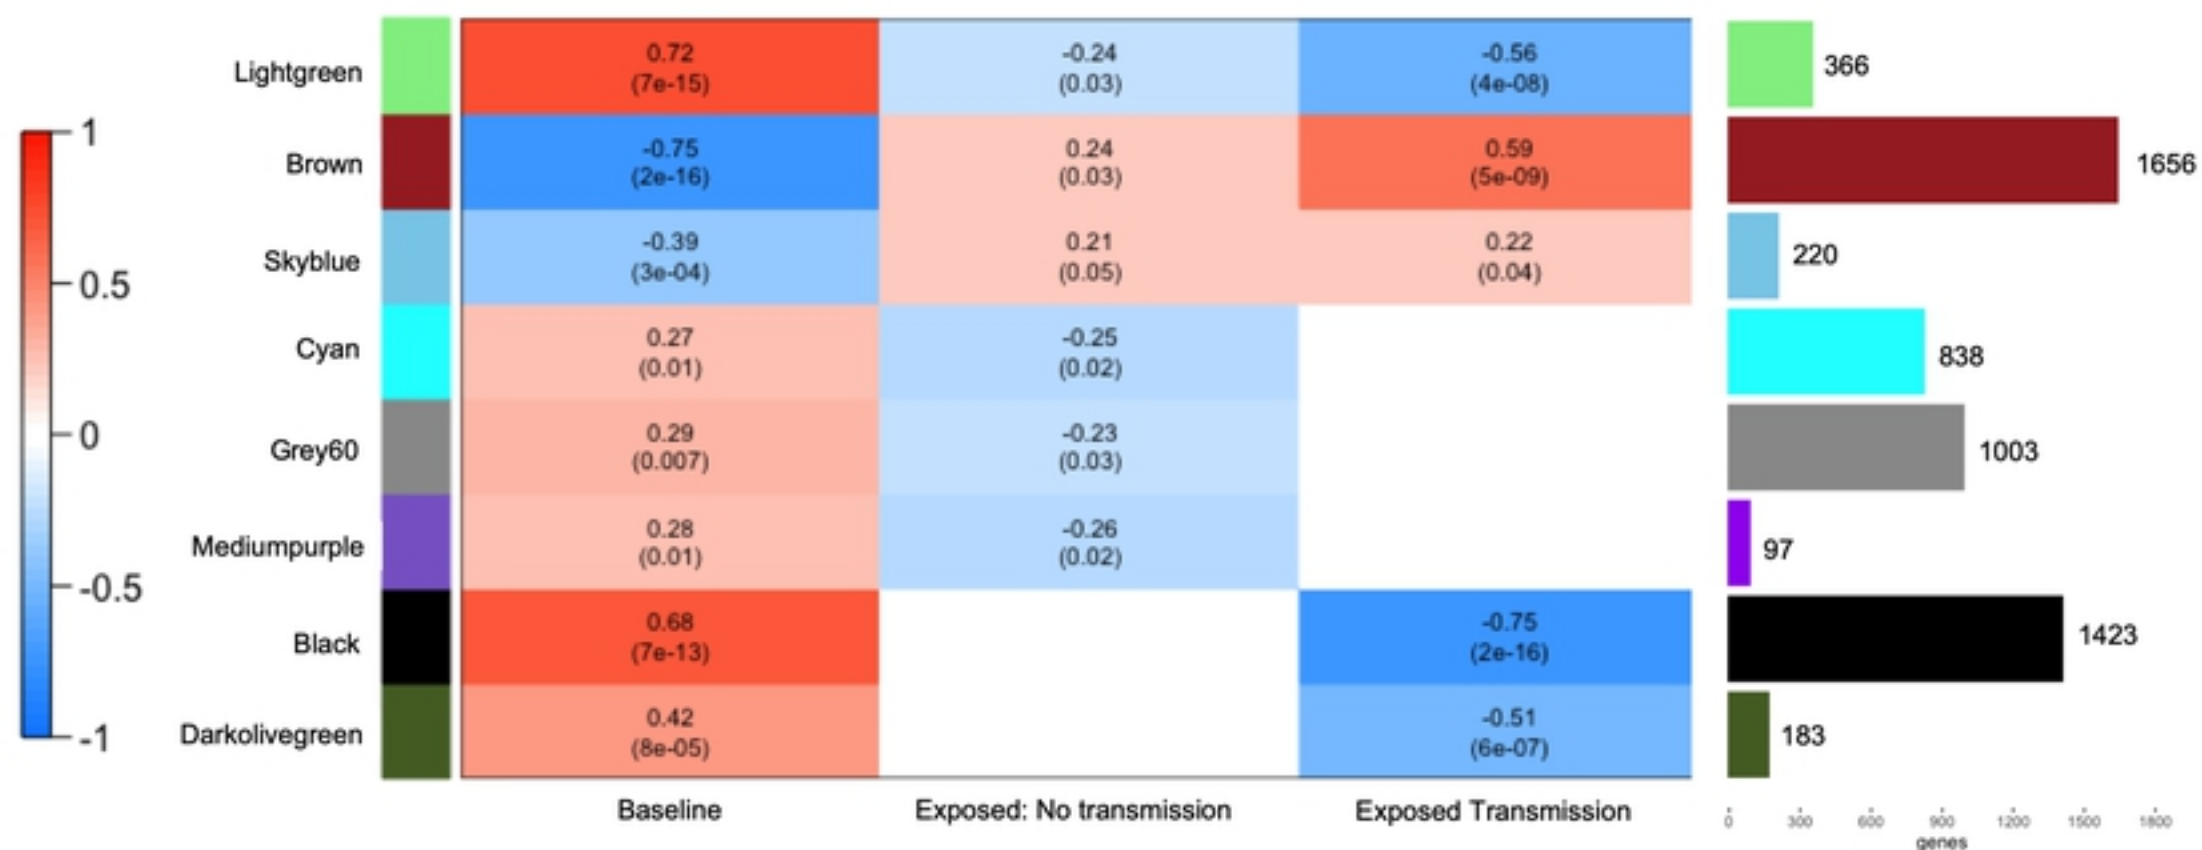

C)

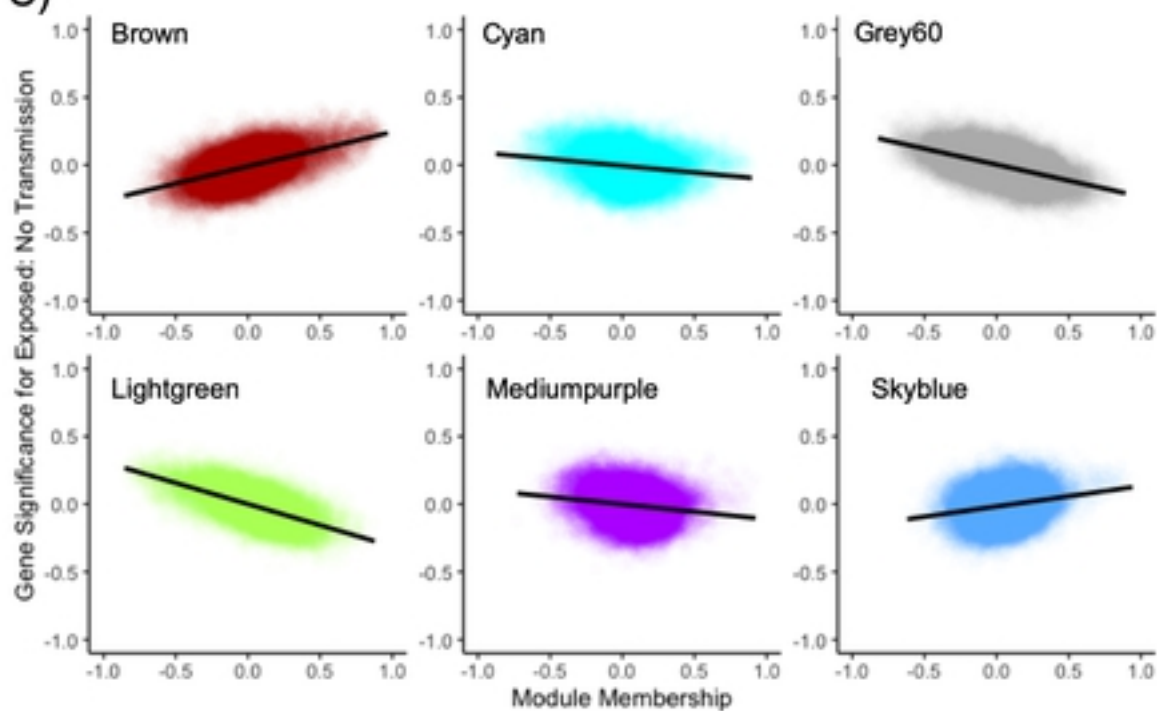

D)

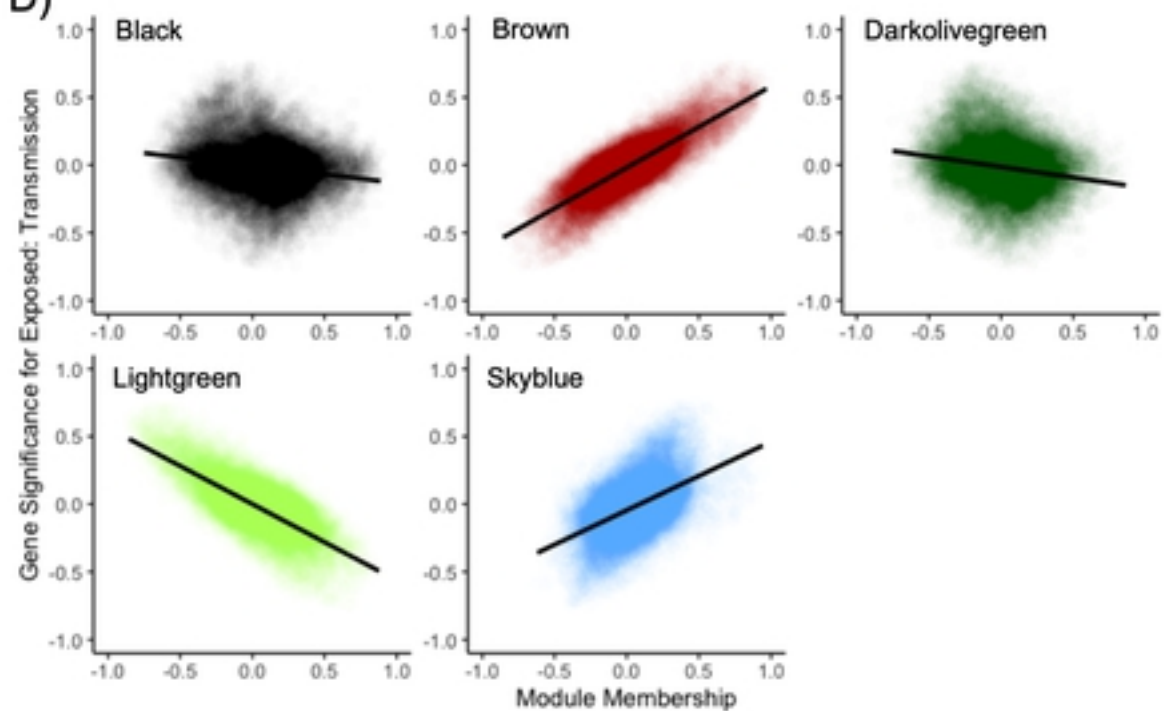

Fig5
